# Supplementary material for: Hepatotoxicity of high affinity gapmer antisense oligonucleotides is mediated by RNase H1 dependent promiscuous reduction of very long pre-mRNA transcripts
Source: PubMed Central journal article supplement — Nucleic Acids Res. 2015 Nov 8;44(5):2093–109. doi: 10.1093/nar/gkv1210 (PMC4797265; doi:10.1093/nar/gkv1210), 2015-11-08

**Supplemental Tables and Figures**  
**Burel et al. 2015**

**Supplemental Table 1:** Description of RT-PCR primers and probes.

**Supplemental Table 2:** Number of perfect matches and partial matches in the liver pre mRNA transcriptome for each LNA ASOs. Columns label 0 to 9 represent the number of mismatches .per putative ASO:RNA duplexes.

**Supplemental Figure 1:** Weblogo representation of the sequence space of LNA ASOs: Positional frequency of nucleotide residues in gap aligned LNA ASOs. (A) All ASO (B) Well tolerated ASOs, (C) Toxic ASOs.

**Supplemental Figure 2:** Liver histopathology from mice treated with either saline or hepatotoxic LNA ASO ISIS 569720 (FXI-2) dosed with 11, 33 and 100 mg/kg, 96 hours after s.c. administration. Hematoxylin and eosin staining (2000x).

**Supplemental Figure 3:** The effects of 3 different type of nucleotide modifications (cEt, LNA and MOE) on the increase of ALT as well as on and off target knockdown were compared for 3 hepatotoxic LNA ASO sequences. (A, top panel) Plasma ALT levels from of Balb/c mice (n=4 per dose) treated with increasing doses of ASOs were measured at 72 hours. (A, bottom 3 panels) On and Off Target mRNA reduction was assessed 24 hours post treatment in the liver by RT-PCR. RNA reduction are presented as percentage reduction relative to saline treated animals. (B) Comparing on target mRNA reduction (solid blue line) for 2 ASO sequences with 3 different nucleotide modification (cEt, LNA and MOE) with 16 different off target mRNAs (dotted lines) 24 hours post treatment in the liver by RT-PCR. The mean reduction for the 16 off target mRNA is also represented (solid red line).

**Supplemental Figure 4.** Assessment of the canonical biological pathways enriched following treatment with LNA using Ingenuity Pathway Analysis Software. (A) Oneway hierarchical clustering of canonical pathways significantly enriched for each ASO administered at the maximum tolerated dose of 300 mg/kg or at a lowest dose producing at least 1000 IU/mL ALT increase at 96 hours. (B) List of modulated pathways based on 594 transcripts modulated at 24 hours in correlation with ALT increase at 96 hours. Standard deviation is shown.

**Supplemental Figure 5.** RNase H1 can only cleave ASO:RNA duplexes if a central portion of the ASO is unmodified. Addition of modified nucleotides to the central region (gap) should reduce or abrogate RNase H activity. (A) Two hepatotoxic cEt ASO were modified to include 3 cEt modifications (in red) in the gap. Balb/c mice (4/group) were treated by subcutaneous injection with a single dose of 200 mg/kg (PTEN) or 50 mg/kg (FVII) gap unmodified or modified ASO. (BC) Liver on-target mRNA levels (FVII and PTEN) (B) and plasma ALT levels (C) were measured in the liver 72 hours post treatment. Modification of the gap resulted in marked reduction of antisense activity and abrogation of ALT increase for both ASO sequences. Standard deviation is shown.

**Supplemental Figure 6.** Comparing the effect of pre-mRNA transcript length and putative site quality on transcript modulation but LNA ASOs dosed at 33 mg/kg for 24 hours. Two parameters describing the quality of putative ASO:RNA cleavage sites are represented: Since multiple putative sites can be found on a given pre-mRNA transcript, sites with the lowest number of mismatches to an ASO for each pre-mRNA transcripts and site with longest contiguous match quality are represented. The number of putative site (7 to 16 bases long) per pre-mRNA transcripts are also shown. Those 3 parameters are compared to either pre-mRNA length or log<sub>2</sub> fold change. (A-G) Data from the 4 most toxic LNA ASOs dose at 33 mg/kg are combined. Transcription changes are filtered to display only significant changes FDR ≤ 0.01. (H-T) Same as A-G but plotted for each ASO assayed at 33 mg/kg separately. Transcription changes are filtered to display only significant changes FDR ≤ 0.1. The lower filter stringency was chosen to emphasize changes occurring following treatment with well tolerated ASOs which induced much lower level of transcript modulation. (U-AD) Same as H-T but no filtered were applied.

**Supplemental Figure 7.** The subchronic tolerability of 3 different cEt ASOs was assessed in Balb/c mice. (A) ALT levels were measured at 12 weeks in the plasma of Balb/c mice treated with 3 different cEt ASOs (50 mg/kg) administered weekly. (B) Off-target mRNA transcripts with long pre-mRNA (Adk, Fars2, Fbxl17, Rptor) were measured by RT-PCR in the liver of mice treated for 12 weeks with the cEt ASOs.

**Supplemental Figure 8.** Reanalysis of data from Kakiuchi-Kiyota et al (<http://www.dtd.nlm.nih.gov/geo/query/acc.cgi?acc=GSE53230>). The authors used affymetrix Array 430 2.0. List of Illumina probes strongly correlated with ALT increase were cross-referenced with those on the affymetrix array and used for hierarchical clustering. (A) Oneway hierarchical clustering of transcripts significantly modulated in the liver at 24 hours post treatment by LNA ASOs in correlation with ALT increase at 96 hours. (Prob>0.000001, r<sub>2</sub>>0.54) shown in figure 3A are applied to the transcription profiles generated by the authors. (B) Comparison of the magnitude of transcript knockdown as a function of pre-mRNA length following treatment with the LNA ASO HTS-3 for 16 hours. HTS-3 is the most hepatotoxic ASO described by the authors.

## Supplemental method

Pathway analysis: A total of 1788 transcripts that had a likely (Benjamini-Hochberg corrected  $q < 0.01$ ) fold change greater than 2 were used for the pathway analysis. Illumina transcript identifiers were imported into Ingenuity Pathway Analysis (IPA) software. The "Core Analysis" function included in IPA was used to interpret the mouse data in the context of canonical pathways. Both up- and down-regulated identifiers were defined as value parameters for the analysis. Significance of the canonical pathways was tested by the Fisher Exact test p-value.

# Supplemental Table 1

| mRNA Target Name | Genbank number | Forward Primer                    | Reverse Primer                 | Probe                                          |
|------------------|----------------|-----------------------------------|--------------------------------|------------------------------------------------|
| RNase H1         | AF048993.1     | 5'-ACTCAGGATTTGTGGGCAATG-3'       | 5'-CCTCAGACTGCTTCGCTCCTT-3'    | 5' FAM-AGAGGCCGACAGACTGGCACGG-TAMRA 3'         |
| RPTOR            | NM_028898.2    | 5'-GCCCTCAGAAAGCTCTGGAA-3'        | 5'-TAGGGTCGAGGCTCTGCTTGT-3'    | 5' FAM-CCATCGGTGCAAACCTACAGAAGCAGTATG-TAMRA 3' |
| FTO              | NM_011936.2    | 5'-AGCAGCCTACAACGTGACTTTG-3'      | 5'-CCACCAGGTTCTCATCGTGAT-3'    | 5' FAM-TTCATGGATCCTCAGAAGATGCCCTACTTG-TAMRA 3' |
| PPP3CA           | NM_008913.1    | 5'-GCCCTCTGACGCCAACCT-3'          | 5'-CTGTCCGTGCCGTTAGTCTCT-3'    | 5' FAM-AACTCCATCAACAAGGCTCTCGCC-TAMRA 3'       |
| PTPRK            | NM_008983.2    | 5'-GAAACTAAAACCCAATGTGTACGAATT-3' | 5'-GATGCCCGCGATTTTCAC-3'       | 5' FAM-AAGAACCAGAAGTGATCCCAGACCCGG-TAMRA 3'    |
| IQGAP2           | NM_027711.1    | 5'-GACCTACCAGCAACTGTTCTAC-3'      | 5'-GAGTGAAGATAACCGTGCCAT-3'    | 5' FAM-AGACCAAACCTTCATACCTGGCTAAGC-TAMRA 3'    |
| CHN2             | NM_023543.2    | 5'-CACACGACAACCACTTCAAC-3'        | 5'-GGCACAGTATTCACACCAGT-3'     | 5' FAM-CAACTTCAAGGTGCACACATTCCGG-TAMRA 3'      |
| FBXL17           | NM_015794.1    | 5'-CGGATGGTGTAAAGAAATCACAGA-3'    | 5'-ATCTCATCAGGCCCAAGTATCTCA-3' | 5' FAM-CAAGGAGCCACCCTGATTGCACAGA-TAMRA 3'      |
| F7               | NM_010172.3    | 5'-AATGAGGAACAGTGCTCCTTTGA-3'     | 5'-TGTAACAATCCAGAACTGCTTGGT-3' | 5' FAM-CCCGGGAGATCTTCAAGAGCCC-TAMRA 3'         |

# Supplemental Table 2

| rank | 1st Toxic Dose (mg/kg) >1000 IU/ml ALT (96h) | Alternative ID | ISIS No | Target Gene  | Sequence                       | 0 | 1  | 2   | 3    | 4    | 5    | 6    | 7    | 8   | 9   |
|------|----------------------------------------------|----------------|---------|--------------|--------------------------------|---|----|-----|------|------|------|------|------|-----|-----|
| 1    | >300                                         | FVII-1         | 571035  | <i>F7</i>    | <u>5'-CAGATATAGGACTGGA-3'</u>  | 0 | 16 | 189 | 1158 | 3203 | 3568 | 2254 | 954  | 355 | 89  |
| 2    | >300                                         | Gen2.5 ctrl    | 569713  | -            | <u>5'-GACGCGCCTGAAGTT-3'</u>   | 0 | 0  | 25  | 355  | 2028 | 4371 | 3340 | 1246 | 434 | 78  |
| 3    | >300                                         | FXI-4          | 569714  | <i>F11</i>   | <u>5'-GGCCACCACGCTGTCA-3'</u>  | 2 | 11 | 124 | 982  | 3099 | 3989 | 2614 | 864  | 309 | 65  |
| 4    | >300                                         | FXI-5          | 571034  | <i>F11</i>   | <u>5'-TGCCACCGTAGACAG-3'</u>   | 1 | 1  | 33  | 430  | 2074 | 3929 | 3136 | 1357 | 481 | 117 |
| 5    | >300                                         | FXI-3          | 571033  | <i>F11</i>   | <u>5'-ATCCAGAGATGCCCTCC-3'</u> | 1 | 9  | 331 | 1688 | 4133 | 3859 | 1372 | 609  | 233 | 68  |
| 6    | >300                                         | SOD1-1         | 569715  | <i>Sod1</i>  | <u>5'-GGACACATTGGCCACA-3'</u>  | 2 | 10 | 218 | 1385 | 3729 | 3524 | 2094 | 888  | 280 | 76  |
| 7    | 300                                          | FVII-2         | 569716  | <i>F7</i>    | <u>5'-CCCTGGGTACACCCC-3'</u>   | 1 | 6  | 109 | 925  | 3156 | 3823 | 2453 | 1026 | 375 | 128 |
| 8    | 300                                          | BIRC5          | 554219  | <i>Birc5</i> | <u>5'-CTCAATCCATGGCAGC-3'</u>  | 0 | 13 | 143 | 1274 | 3341 | 3908 | 2168 | 893  | 319 | 90  |
| 9    | 100                                          | FXI-2          | 569720  | <i>F11</i>   | <u>5'-GTCAGTATCCCAGTGT-3'</u>  | 1 | 2  | 148 | 1183 | 3229 | 3803 | 2295 | 948  | 309 | 109 |
| 11   | 100                                          | FVII-3         | 569718  | <i>F7</i>    | <u>5'-TGGTCCCTGCAGTACT-3'</u>  | 1 | 8  | 192 | 1228 | 3457 | 3973 | 2226 | 765  | 238 | 62  |
| 10   | 33                                           | PTEN           | 569717  | <i>Pten</i>  | <u>5'-ATCATGGCTGCAGCTT-3'</u>  | 1 | 11 | 264 | 1523 | 3754 | 3769 | 2011 | 762  | 235 | 47  |
| 12   | 33                                           | SOD1-2         | 569721  | <i>Sod1</i>  | <u>5'-TGAGTCCTGCACCTGG-3'</u>  | 1 | 14 | 224 | 1377 | 3381 | 3958 | 2177 | 731  | 249 | 38  |
| 13   | 11                                           | FXI-1          | 569719  | <i>F11</i>   | <u>5'-GTCTGTGCATCTCTCC-3'</u>  | 1 | 18 | 337 | 2003 | 3853 | 3387 | 1591 | 636  | 254 | 58  |

# Supplemental Figure 1

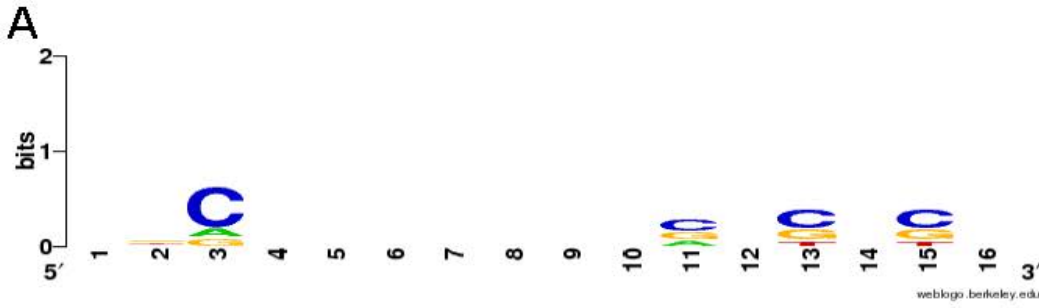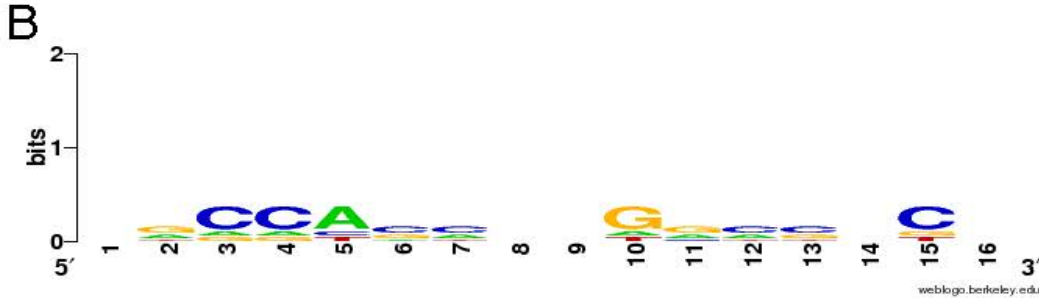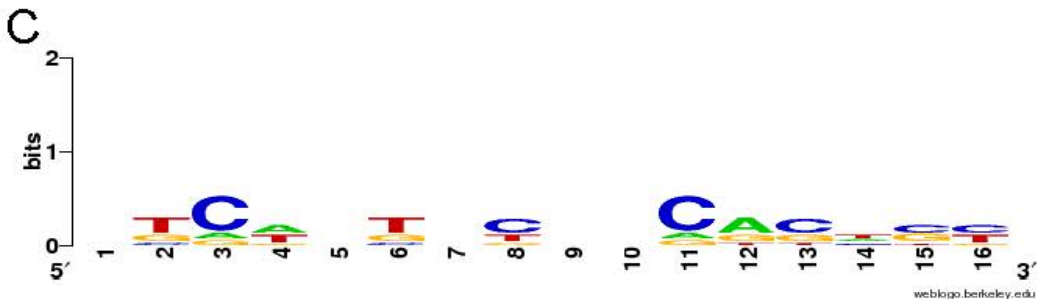

# Supplemental Figure 2

Saline

Normal liver morphology

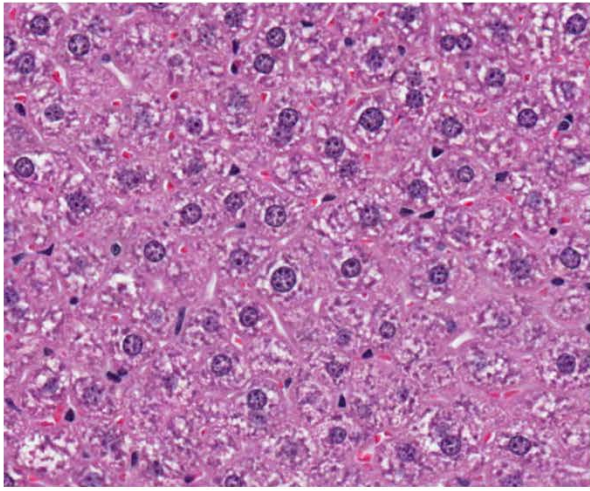

ISIS 569720 (FXI-2) 11 mg/kg – 96h

Mild to moderate microvascular changes

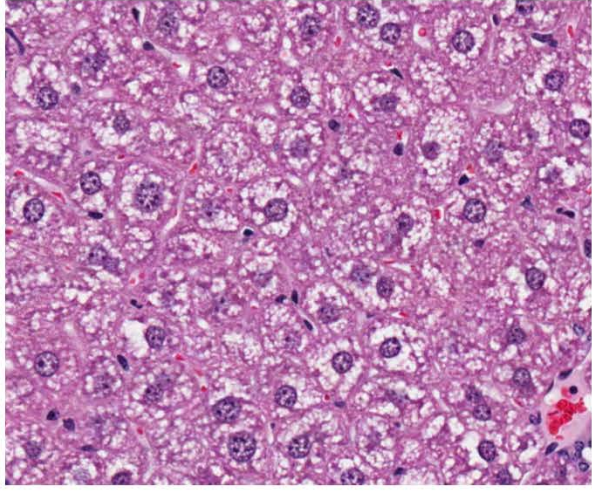

ISIS 569720 (FXI-2) 33 mg/kg – 96h

Mild to moderate microvascular changes

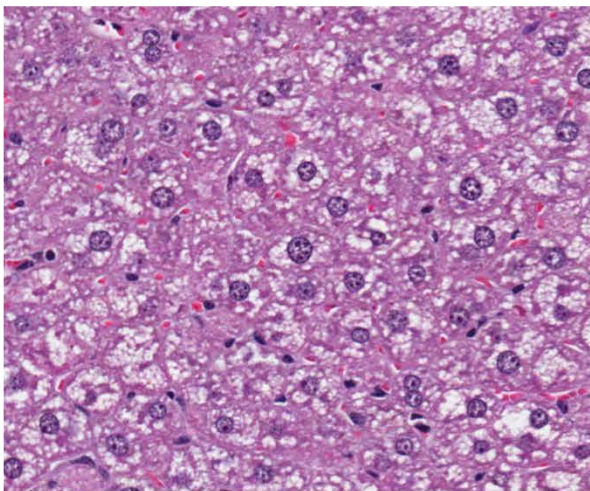

ISIS 569720 (FXI-2) 100 mg/kg – 96h

Severe zonal (zone 1) necrosis

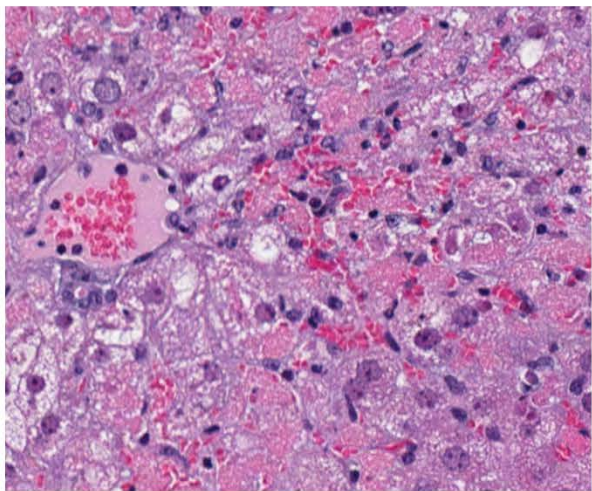



# Supplemental Figure 3

A

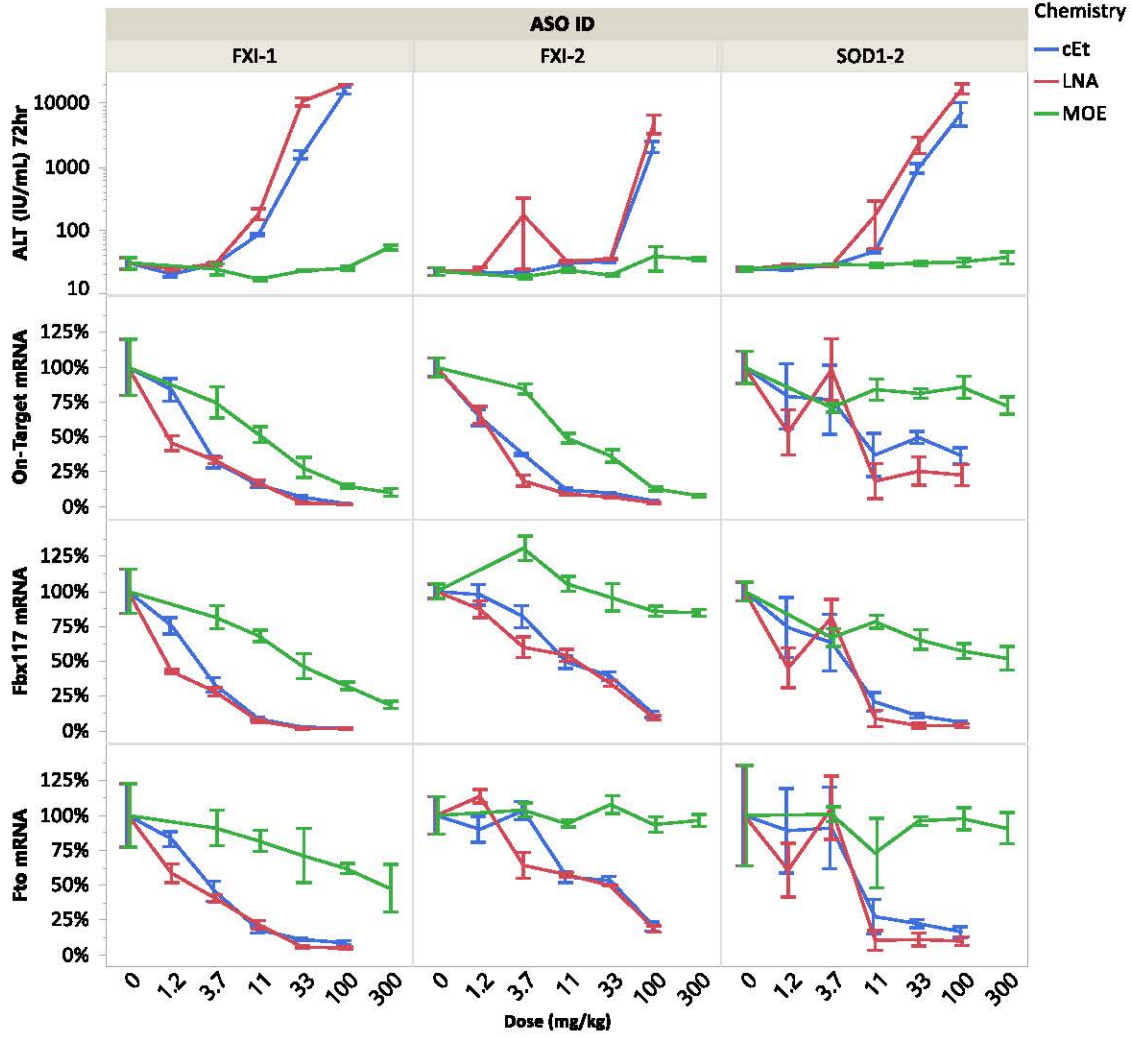

B

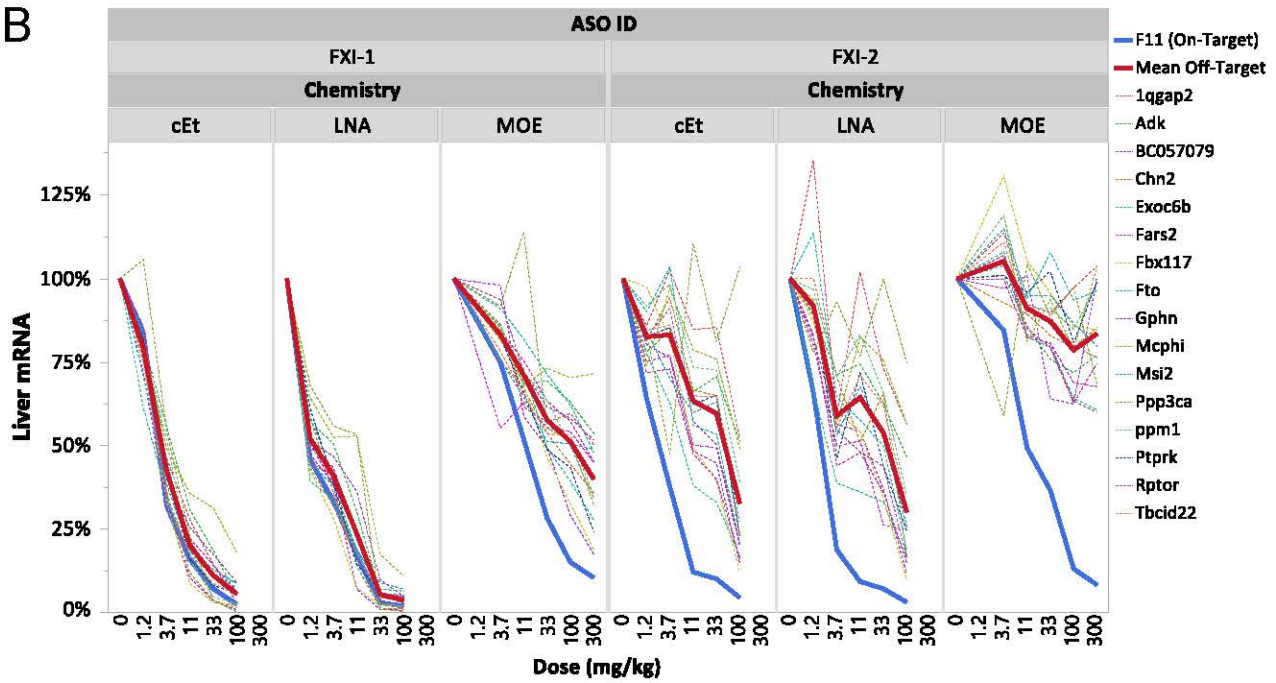

# Supplemental Figure 4

A

- Hereditary Breast Cancer Signaling
- Role of BRCA1 in DNA Damage Response
- JAK/Stat Signaling
- TR/RXR Activation
- Cell Cycle Control of Chromosomal Replication
- Breast Cancer Regulation by Stathmin1
- ATM Signaling
- Role of CHK Proteins in Cell Cycle Checkpoint Control
- Molecular Mechanisms of Cancer
- Glycosphingolipid Biosynthesis - Lactoseries
- O-Glycan Biosynthesis
- Rac Signaling
- Relaxin Signaling
- Androgen Signaling
- Dopamine-DARPP32 Feedback in cAMP Signaling
- Synaptic Long Term Depression
- Melatonin Signaling
- Neuropathic Pain Signaling In Dorsal Horn Neurons
- Role of Tissue Factor in Cancer
- Thrombin Signaling
- CXCR4 Signaling
- $\alpha$ -Adrenergic Signaling
- Endothelin-1 Signaling
- Renin-Angiotensin Signaling
- EGF Signaling
- Non-Small Cell Lung Cancer Signaling

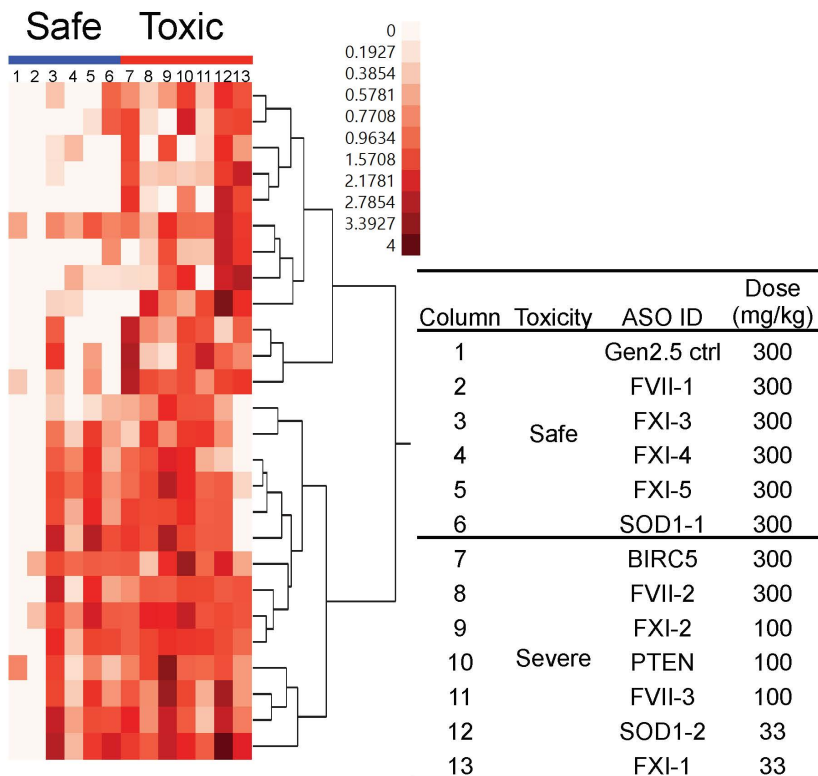

B

| Modulation                    | Ingenuity Canonical Pathways                          | $-\log$ (p-value) | Transcripts                                                                                                            |
|-------------------------------|-------------------------------------------------------|-------------------|------------------------------------------------------------------------------------------------------------------------|
| Top 10 Upregulated Pathways   | EIF2 Signaling                                        | 8.71              | RPL24, EIF2S3, EIF2B4, RPS19, RPS8, RPS21, EIF2B2, RPL7, RPS4X, RPS10, RPS26, EIF4A1, EIF5, RPL35, RPL19, RPLP2, RPL18 |
|                               | Regulation of eIF4 and p70S6K Signaling               | 4.98              | EIF2S3, RPS4X, PPP2R1A, EIF2B4, RPS10, RPS26, EIF4A1, RPS19, RPS8, RPS21, EIF2B2                                       |
|                               | Hereditary Breast Cancer Signaling                    | 3.55              | TP53, NPM1, POLR2A, POLR2D, GADD45A, H2AFX, CDK4, POLR2H                                                               |
|                               | Pyrimidine Metabolism                                 | 3                 | NME3, POLR2A, POLR2D, PNP, POLR2H, NUDT2, PUS1, UMP5                                                                   |
|                               | Aminoacyl-tRNA Biosynthesis                           | 2.89              | NARS, RARS, QARS, IARS                                                                                                 |
|                               | mTOR Signaling                                        | 2.73              | RPS4X, PPP2R1A, RPS10, RPS26, EIF4A1, RPS19, RPS8, RPS21, MLST8                                                        |
|                               | GADD45 Signaling                                      | 2.6               | TP53, GADD45A, CDK4                                                                                                    |
|                               | One Carbon Pool by Folate                             | 2.53              | MTHFD2, ATIC, SHMT2                                                                                                    |
|                               | Inositol Metabolism                                   | 2.51              | ALDOA, ALDOC                                                                                                           |
|                               | Role of CHK Proteins in Cell Cycle Checkpoint Control | 2.1               | TP53, PPP2R1A, HUS1, ATMIN                                                                                             |
| Top 10 Downregulated Pathways | Breast Cancer Regulation by Stathmin1                 | 4.32              | ADCY9, MAP2K2, ITPR2, PPM1L, PIK3C2G, PRKAG2, ARHGEF11, ITPR1, PPP1CA, GNG12, PRKCA                                    |
|                               | $\alpha$ -Adrenergic Signaling                        | 3.83              | ADCY9, MAP2K2, ITPR2, PRKAG2, ITPR1, GNG12, PRKCA                                                                      |
|                               | CXCR4 Signaling                                       | 3.74              | ADCY9, DOCK1, MAP2K2, ITPR2, PIK3C2G, ARHGEF11, ITPR1, GNG12, PRKCA                                                    |
|                               | Gap Junction Signaling                                | 3.55              | ADCY9, MAP2K2, ITPR2, PIK3C2G, PRKAG2, ITPR1, MAP2K5, PPP3CA, PRKCA                                                    |
|                               | Synaptic Long Term Potentiation                       | 3.35              | MAP2K2, ITPR2, PRKAG2, ITPR1, PPP1CA, PPP3CA, PRKCA                                                                    |
|                               | fMLP Signaling in Neutrophils                         | 3.25              | MAP2K2, ITPR2, PIK3C2G, ITPR1, GNG12, PPP3CA, PRKCA                                                                    |
|                               | Renin-Angiotensin Signaling                           | 3.23              | ADCY9, MAP2K2, ITPR2, PIK3C2G, PRKAG2, ITPR1, PRKCA                                                                    |
|                               | Role of NFAT in Cardiac Hypertrophy                   | 3.14              | ADCY9, MAP2K2, ITPR2, PIK3C2G, PRKAG2, ITPR1, GNG12, PPP3CA, PRKCA                                                     |
|                               | CCR3 Signaling in Eosinophils                         | 3.11              | MPRIIP, MAP2K2, ITPR2, PIK3C2G, ITPR1, GNG12, PRKCA                                                                    |
|                               | Protein Kinase A Signaling                            | 3.05              | ADCY9, MAP2K2, ITPR2, SMAD3, RYR3, PRKAG2, ITPR1, PPP1CA, AKAP7, GNG12, PPP3CA, PRKCA                                  |

# Supplemental Figure 5

A

| ASO ID | Targets | Dose (mg/kg) | Sequence (red=cEt) | Chemistry Notation (k=cEt, d=deoxy) |
|--------|---------|--------------|--------------------|-------------------------------------|
| 482051 | PTEN    | 200          | TCATGGCTGCA        | kkddddddddddkk                      |
|        |         |              | GCT                |                                     |
| 483520 |         |              | TCATGGCTGCA        | kkddkdkddkddkk                      |
|        |         |              | GCT                |                                     |
| 457852 | FVII    | 50           | GGTCCCTGCAG        | kkddddddddddkk                      |
|        |         |              | TAC                |                                     |
| 483526 |         |              | GGTCCCTGCAG        | kkddkdkddkddkk                      |
|        |         |              | TAC                |                                     |

B

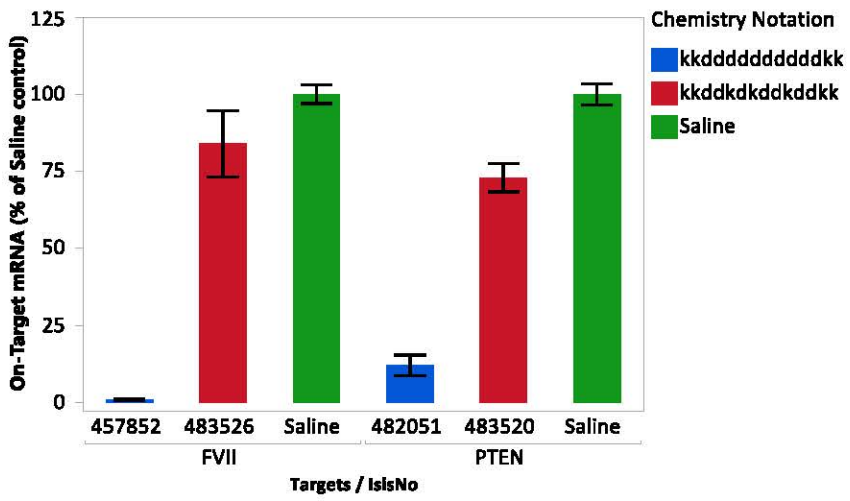

C

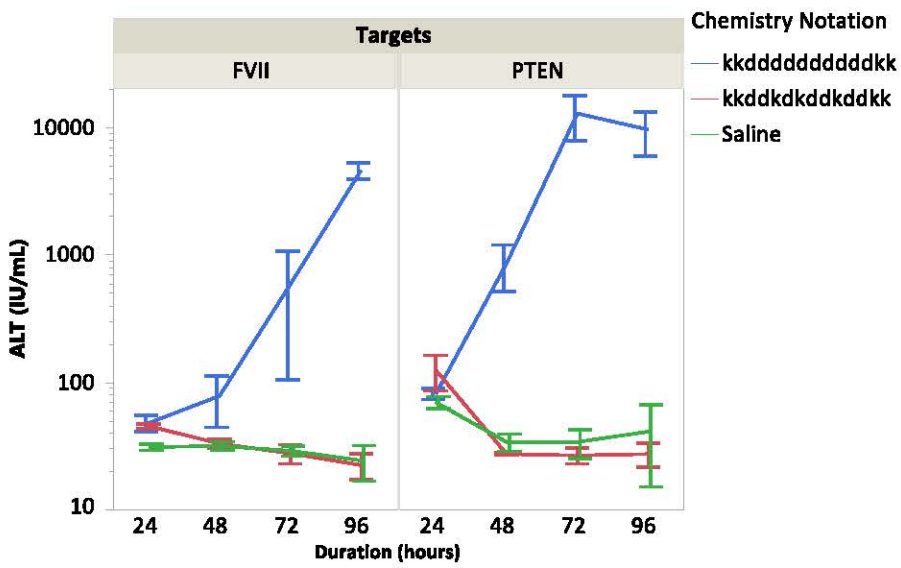

# Supplemental Figure 6

Filtered at FDR 0.01 –  
4 Tox ASO at 33 mg/kg

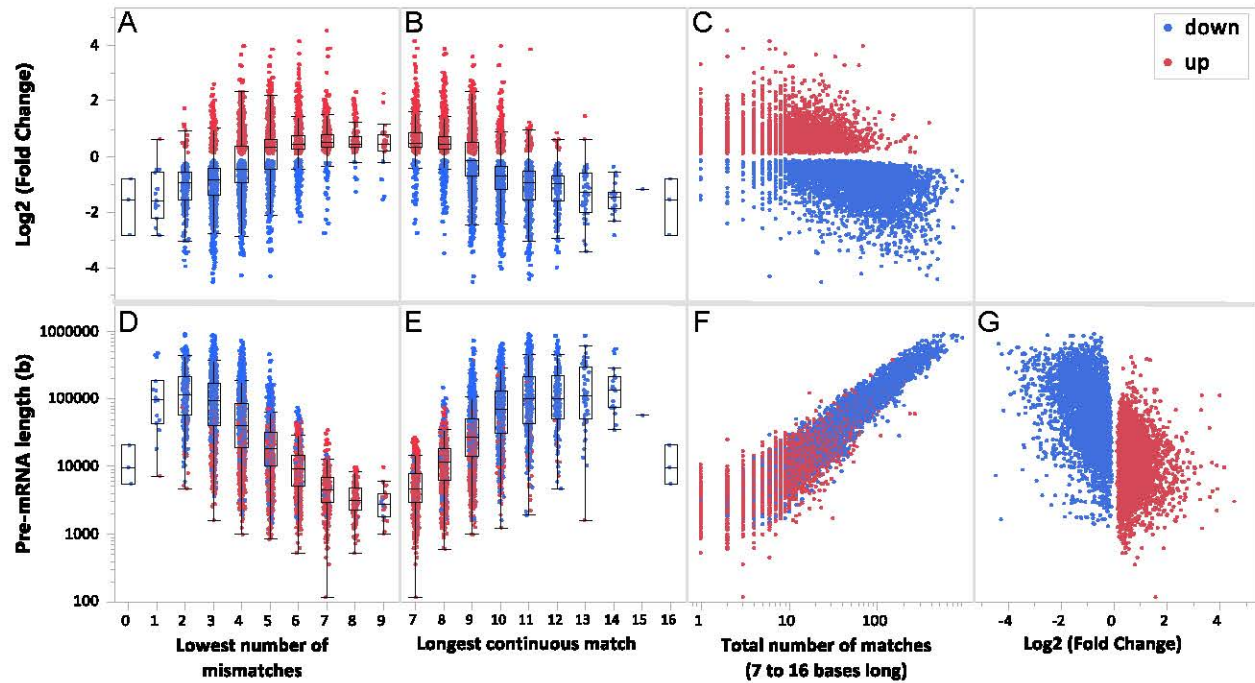

# Supplemental Figure 6

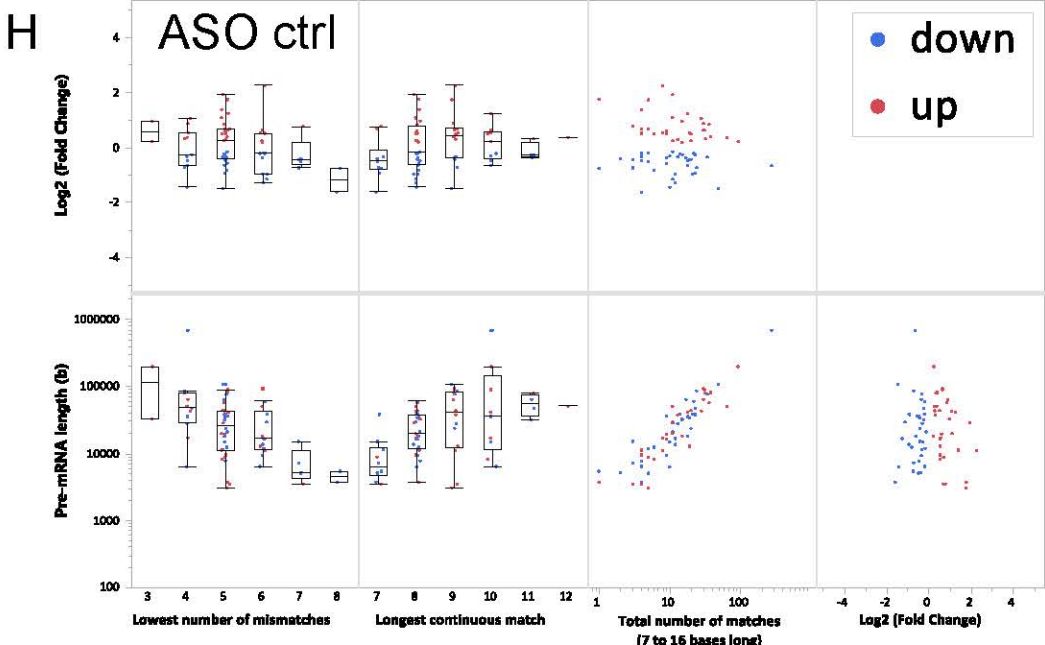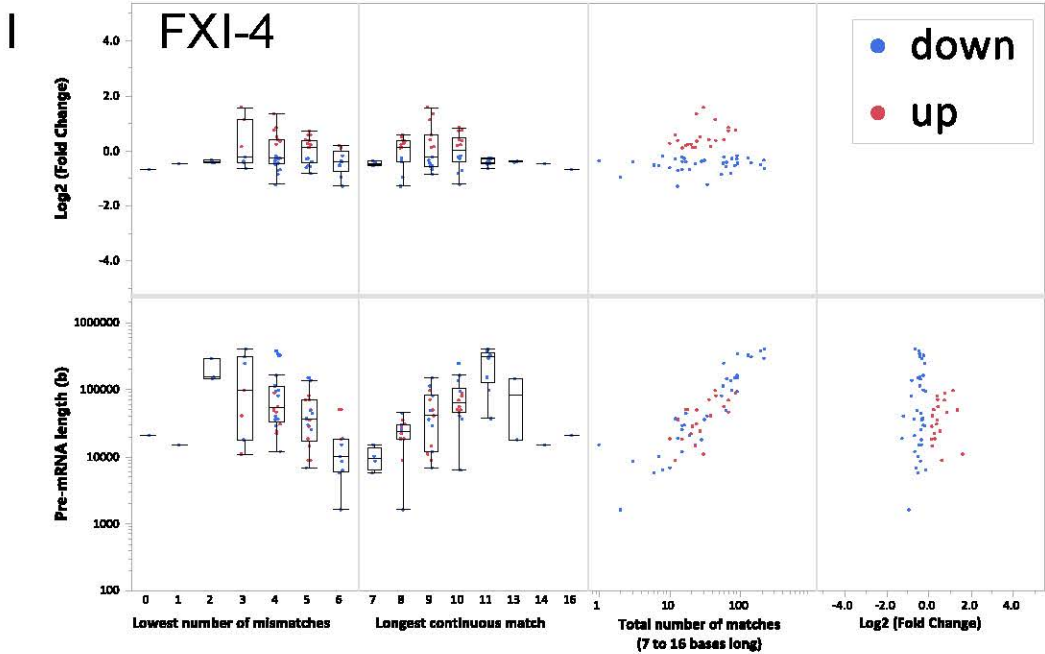

|              | ASO ID | Alt. ID  | Dose (mg/kg) | Toxicity (96 h) | ALT (IU/mL) 96 hours |
|--------------|--------|----------|--------------|-----------------|----------------------|
| Top graph    | 569713 | ASO ctrl | 33           | Safe            | 23                   |
|              |        |          | 300          | Safe            | 27                   |
| Bottom graph | 569714 | FXI-4    | 33           | Safe            | 32                   |
|              |        |          | 300          | Safe            | 30                   |



# Supplemental Figure 6

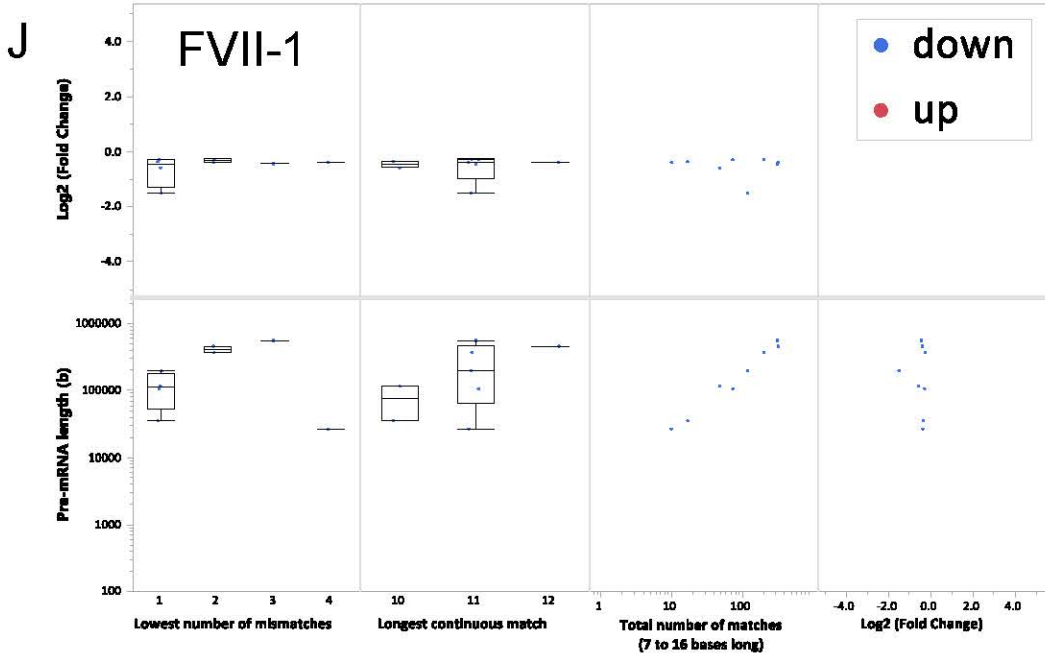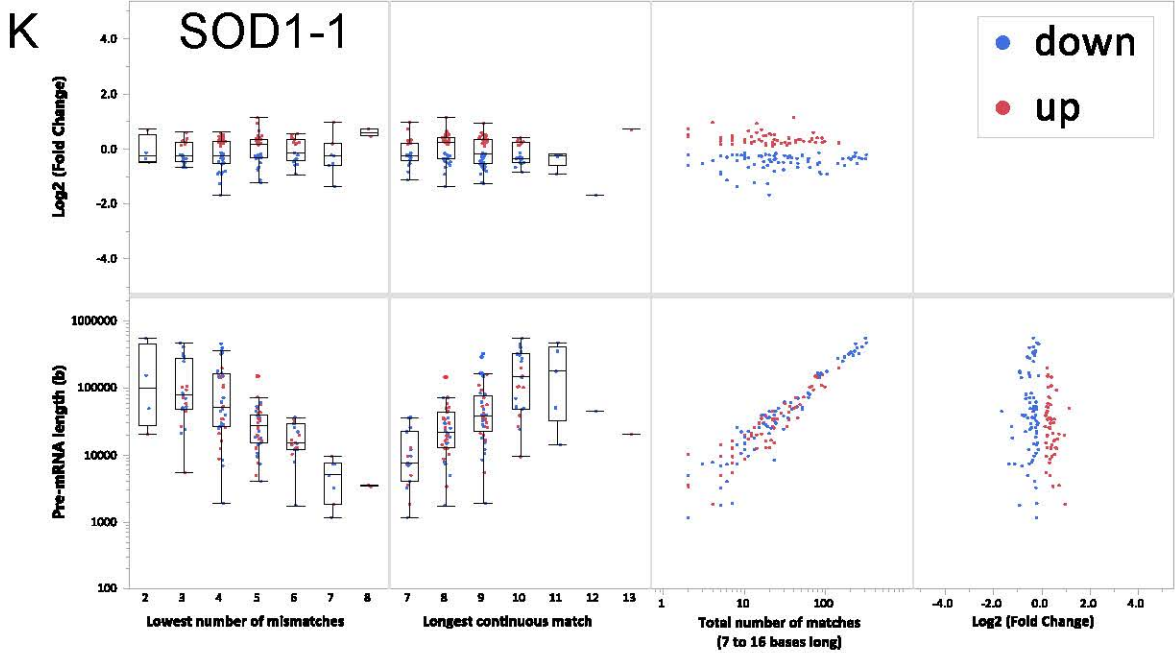

|              | ASO ID | Alt. ID | Dose (mg/kg) | Toxicity (96 h) | ALT (IU/mL) 96 hours |
|--------------|--------|---------|--------------|-----------------|----------------------|
| Top graph    | 571035 | FVII-1  | 33           | Safe            | 19                   |
|              |        |         | 300          | Safe            | 93                   |
| Bottom graph | 569715 | SOD1-1  | 33           | Safe            | 39                   |
|              |        |         | 300          | Safe            | 87                   |

# Supplemental Figure 6

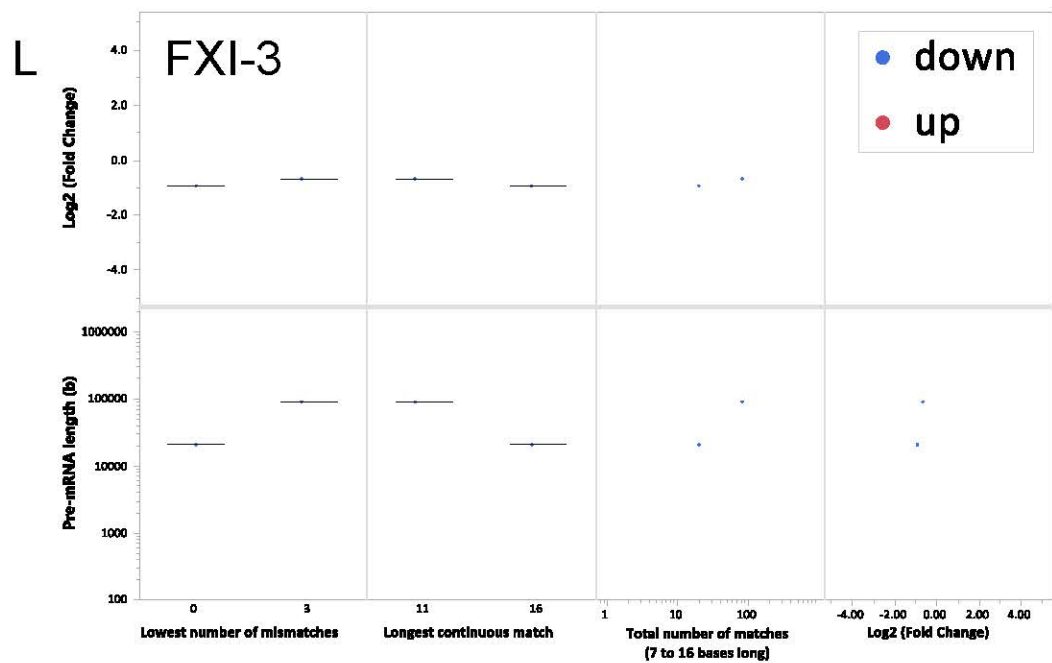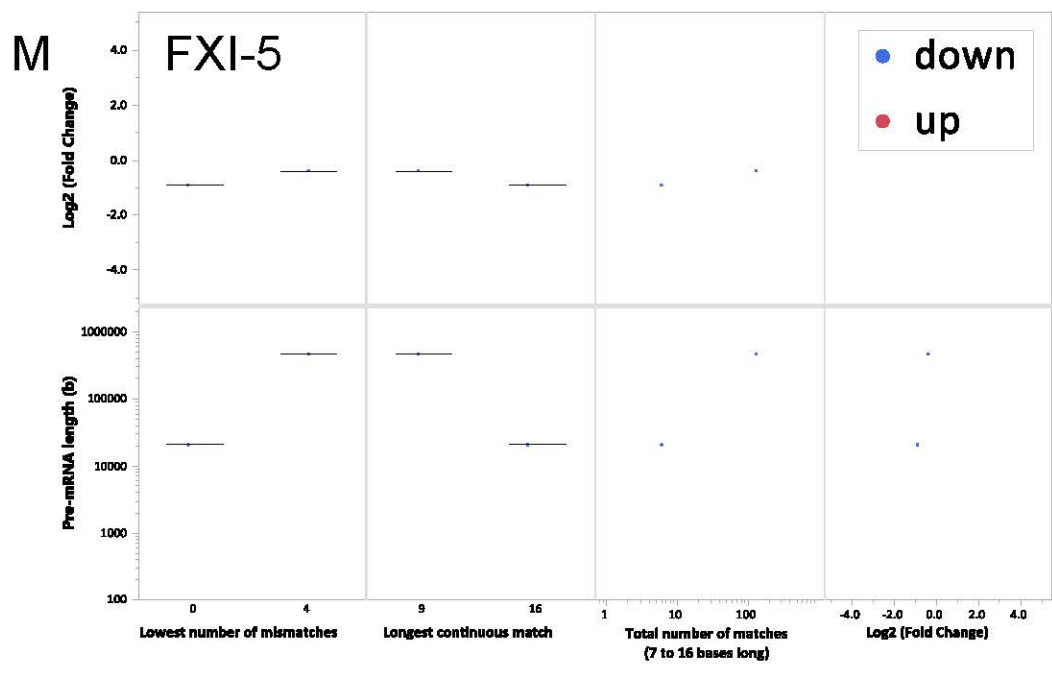

|              | ASO ID | Alt. ID | Dose (mg/kg) | Toxicity (96 h) | ALT (IU/mL) 96 hours |
|--------------|--------|---------|--------------|-----------------|----------------------|
| Top graph    | 571033 | FXI-3   | 33           | Safe            | 33                   |
|              |        |         | 300          | Safe            | 121                  |
| Bottom graph | 571034 | FXI-5   | 33           | Safe            | 56                   |
|              |        |         | 300          | Safe            | 193                  |

# Supplemental Figure 6

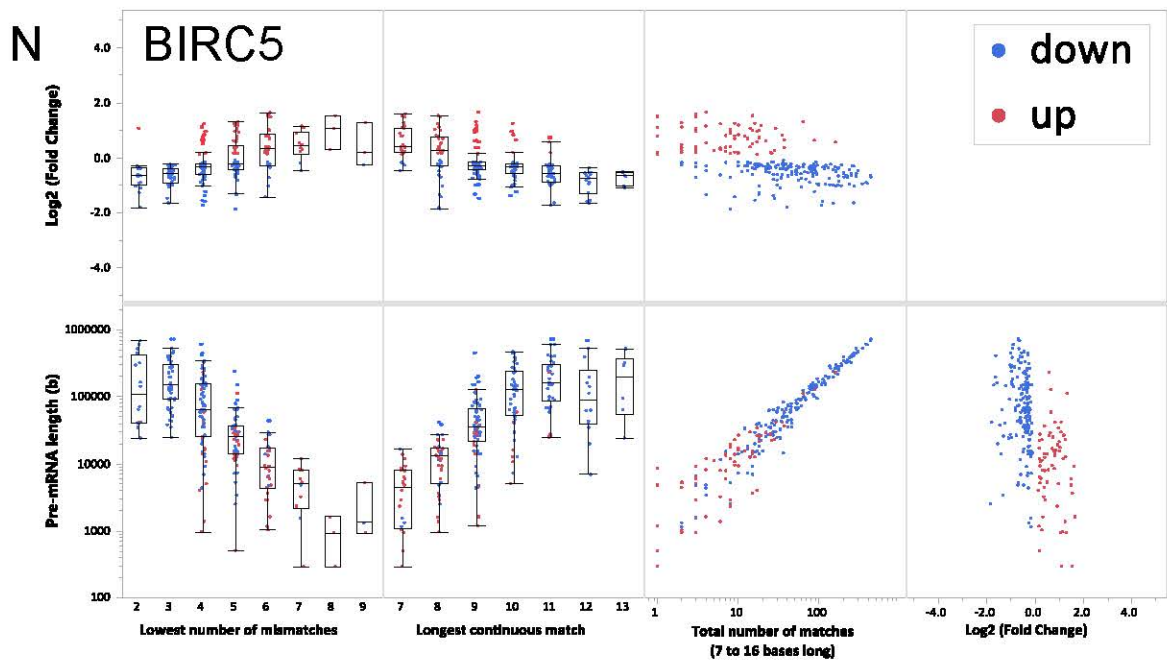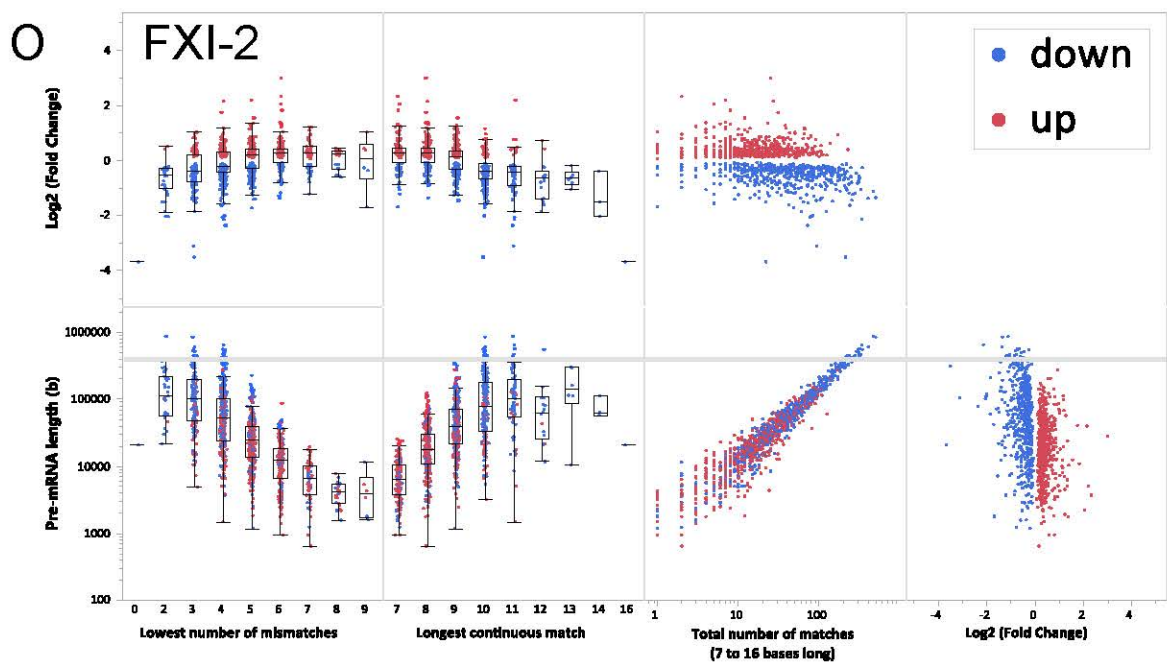

|              | ASO ID | Alt. ID | Dose (mg/kg) | Toxicity (96 h) | ALT (IU/mL) 96 hours |
|--------------|--------|---------|--------------|-----------------|----------------------|
| Top graph    | 554219 | BIRC5   | 33           | Safe            | 33                   |
|              |        |         | 300          | Severe          | 1475                 |
| Bottom graph | 569720 | FXI-2   | 33           | Safe            | 125                  |
|              |        |         | 100          | Severe          | 10179                |



# Supplemental Figure 6

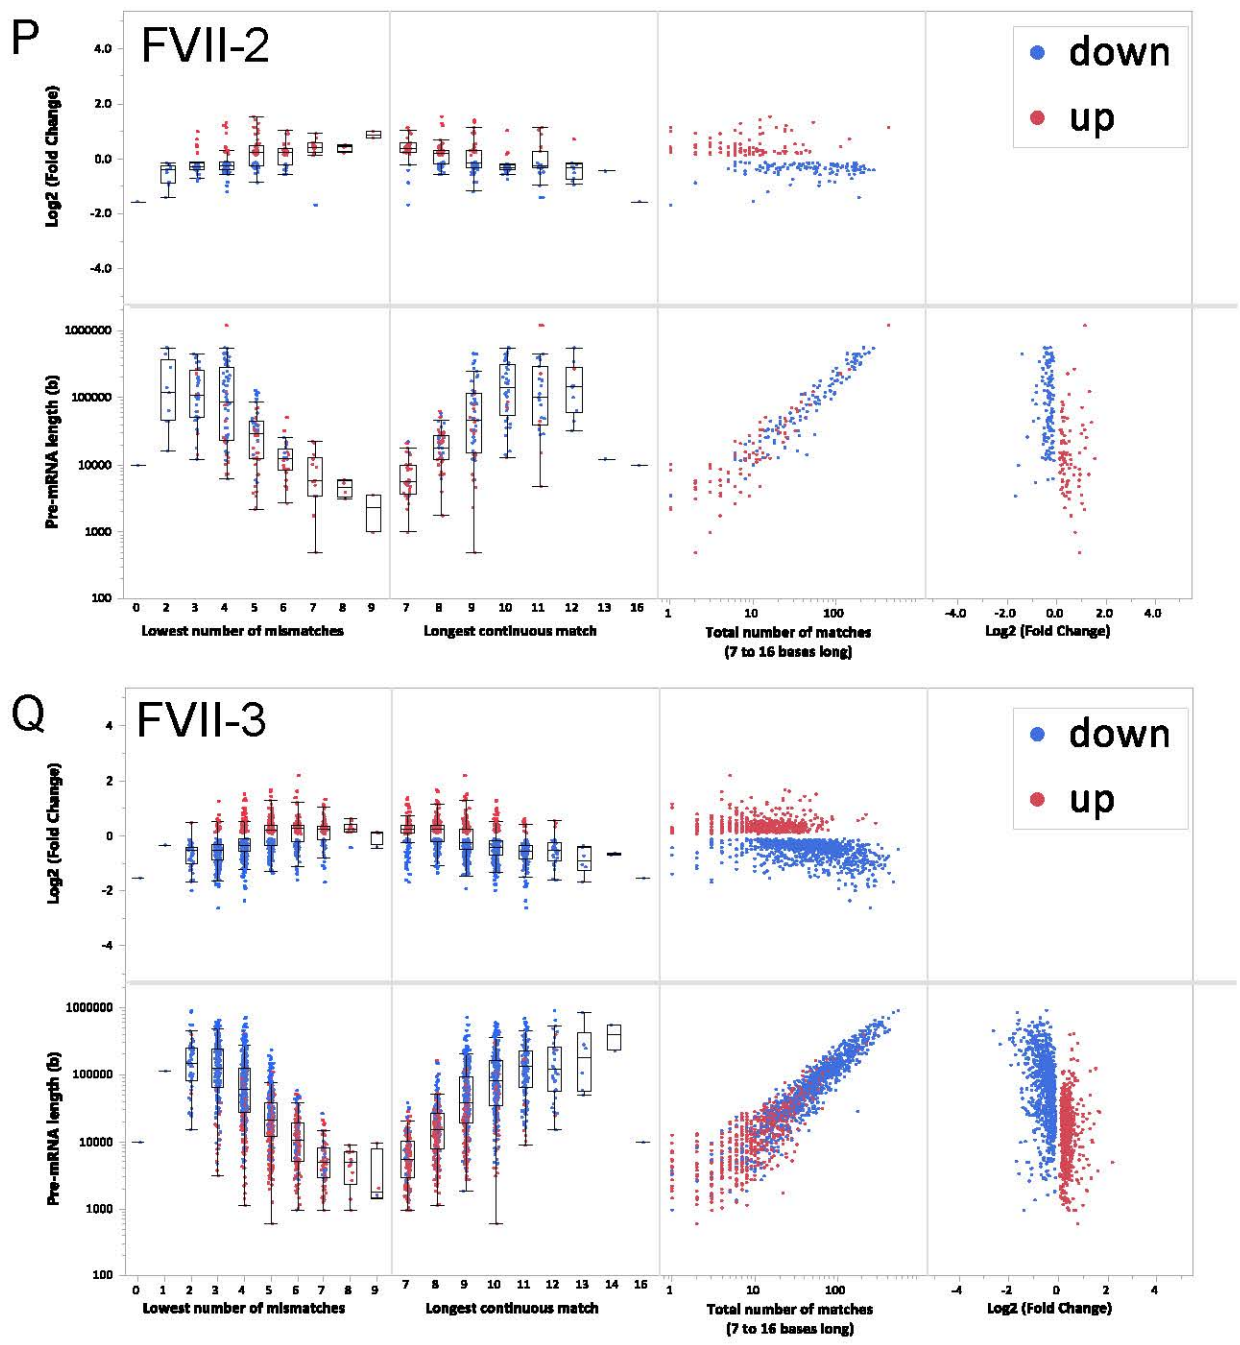

|              | ASO ID | Alt. ID | Dose (mg/kg) | Toxicity (96 h) | ALT (IU/mL) 96 hours |
|--------------|--------|---------|--------------|-----------------|----------------------|
| Top graph    | 569716 | FVII-2  | 33           | Safe            | 128                  |
|              |        |         | 300          | Severe          | 4690                 |
| Bottom graph | 569718 | FVII-3  | 33           | Moderate        | 461                  |
|              |        |         | 100          | Severe          | 5034                 |

# Supplemental Figure 6

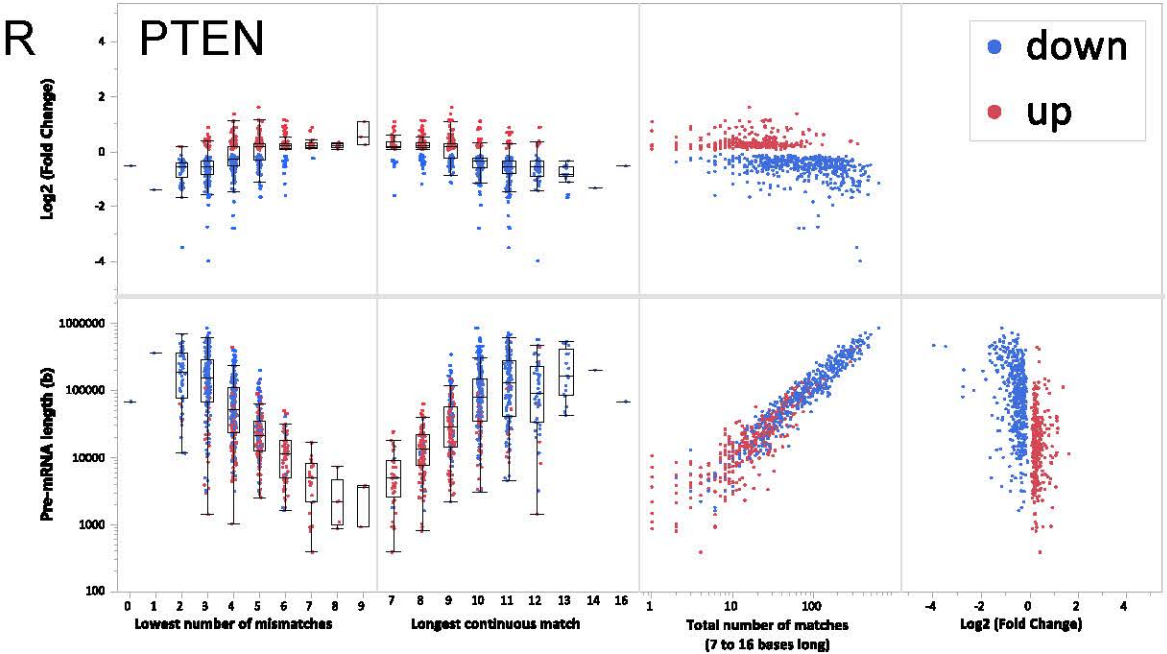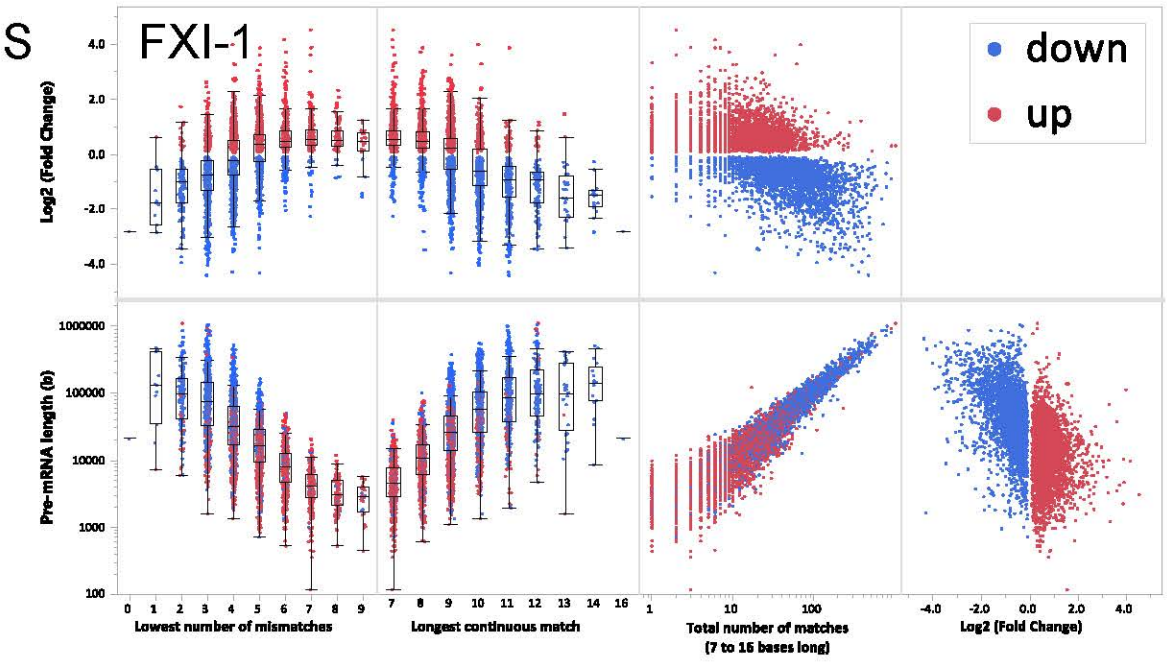

|              | ASO ID | Alt. ID | Dose (mg/kg) | Toxicity (96 h) | ALT (IU/mL) 96 hours |
|--------------|--------|---------|--------------|-----------------|----------------------|
| Top graph    | 569717 | PTEN    | 33           | Severe          | 1143                 |
|              |        |         | 100          | Severe          | 10262                |
| Bottom graph | 569719 | FXI-1   | 11           | Severe          | 1486                 |
|              |        |         | 33           | Severe          | 20000                |

# Supplemental Figure 6

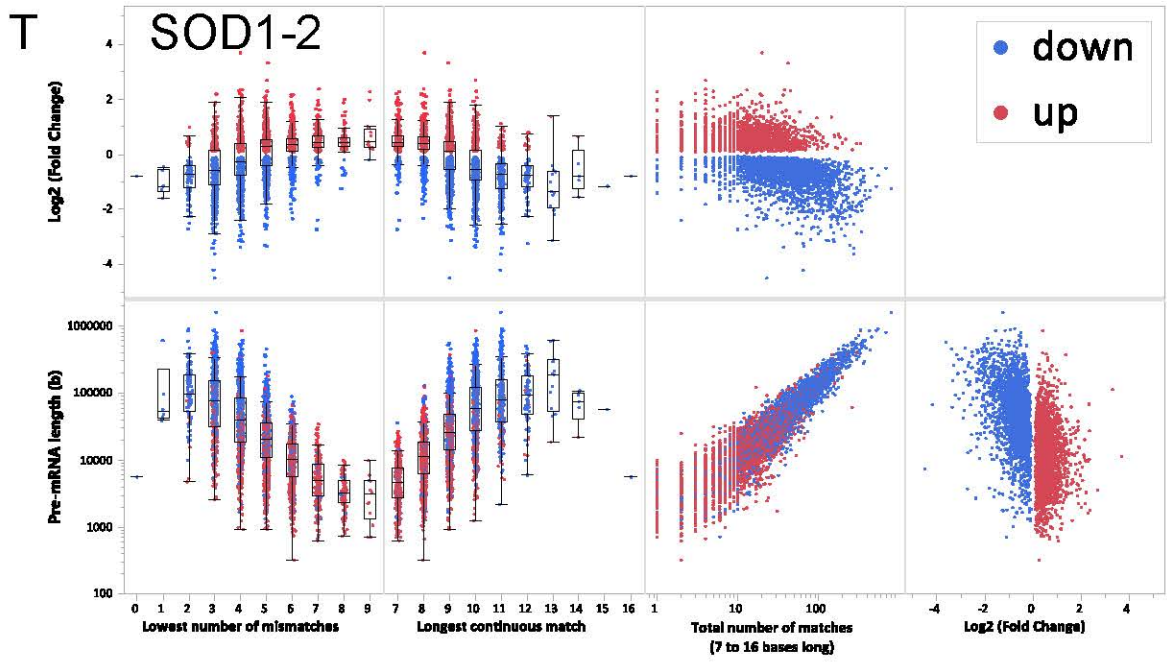

| ASO ID | Alt. ID | Dose (mg/kg) | Toxicity (96 h) | ALT (IU/mL) 96 hours |
|--------|---------|--------------|-----------------|----------------------|
| 569721 | SOD1-2  | 33           | Severe          | 2288                 |

# Supplemental Figure 6

U

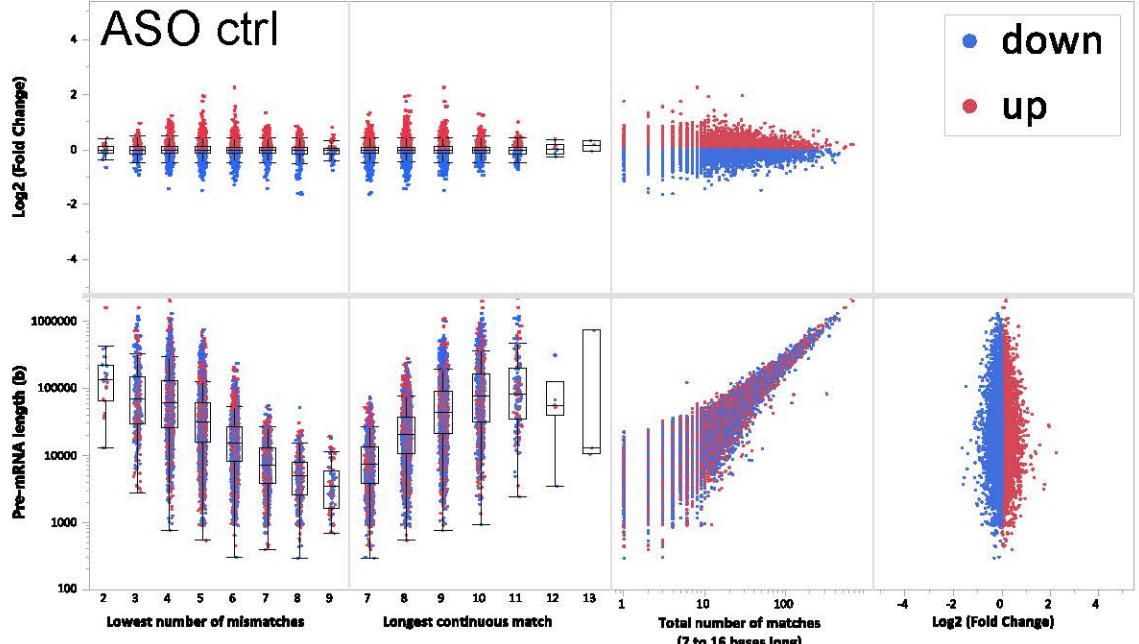

V

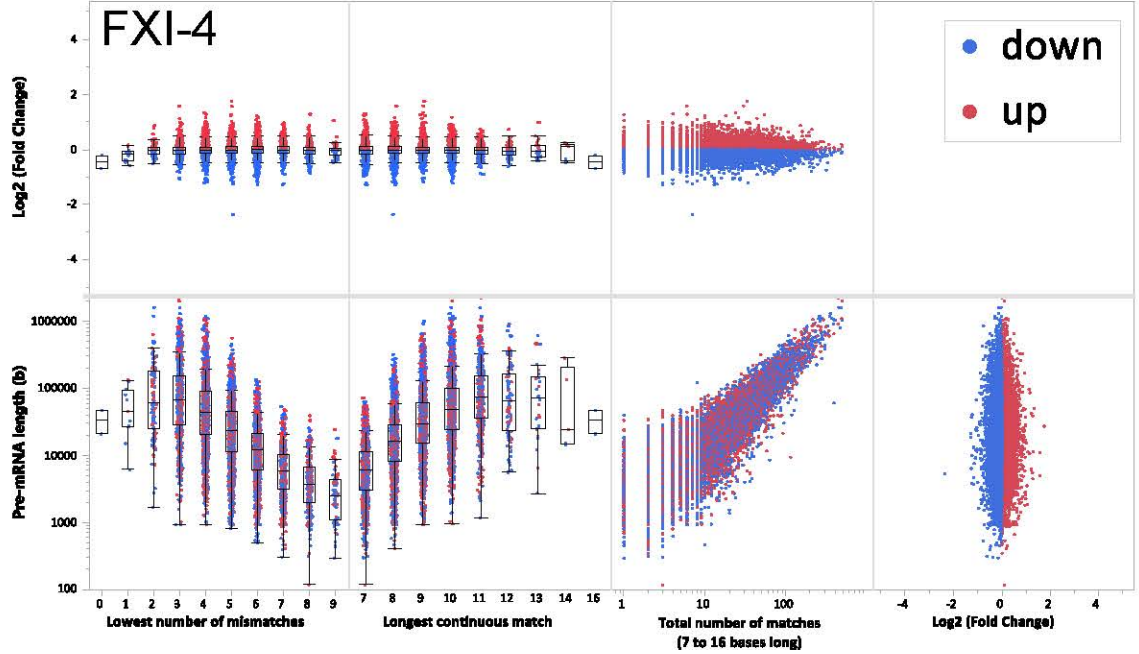

|              | ASO ID | Alt. ID  | Dose (mg/kg) | Toxicity (96 h) | ALT (IU/mL) 96 hours |
|--------------|--------|----------|--------------|-----------------|----------------------|
| Top graph    | 569713 | ASO ctrl | 33           | Safe            | 23                   |
|              |        |          | 300          | Safe            | 27                   |
| Bottom graph | 569714 | FXI-4    | 33           | Safe            | 32                   |
|              |        |          | 300          | Safe            | 30                   |



# Supplemental Figure 6

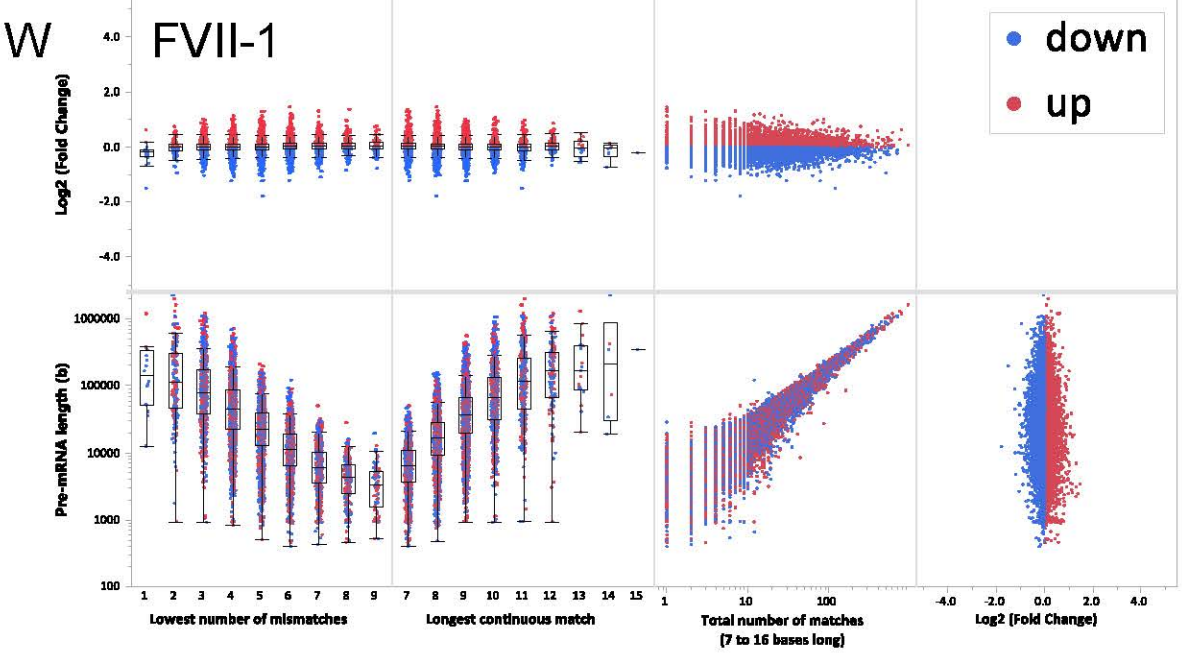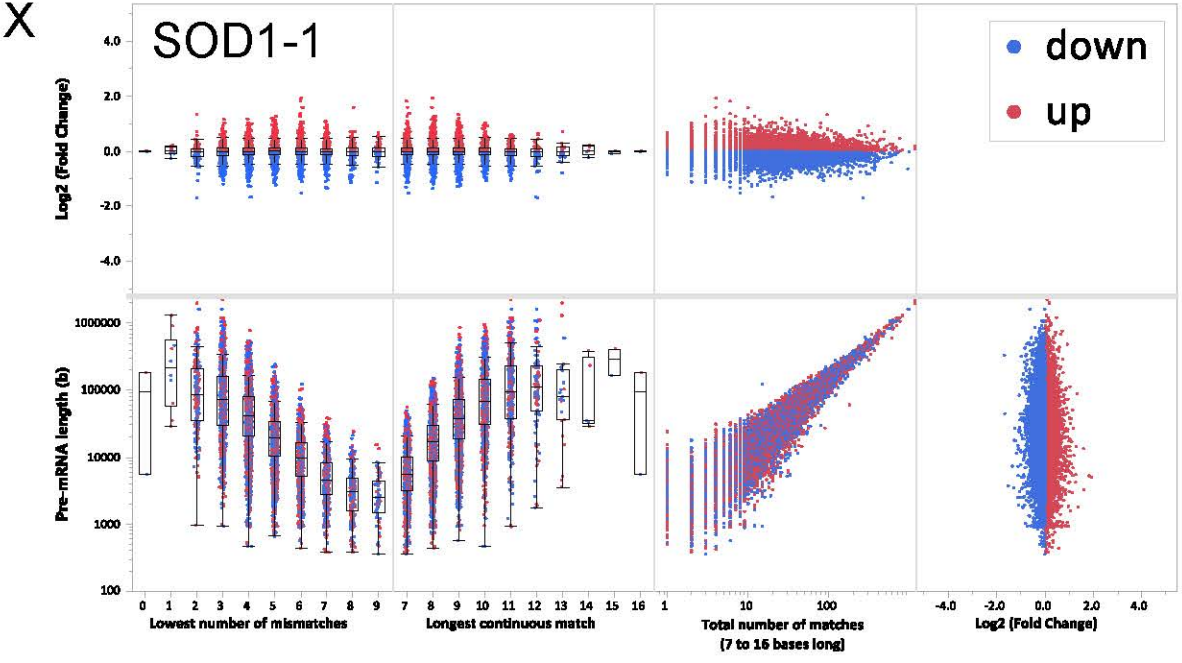

|              | ASO ID | Alt. ID | Dose (mg/kg) | Toxicity (96 h) | ALT (IU/mL) 96 hours |
|--------------|--------|---------|--------------|-----------------|----------------------|
| Top graph    | 571035 | FVII-1  | 33           | Safe            | 19                   |
|              |        |         | 300          | Safe            | 93                   |
| Bottom graph | 569715 | SOD1-1  | 33           | Safe            | 39                   |
|              |        |         | 300          | Safe            | 87                   |

# Supplemental Figure 6

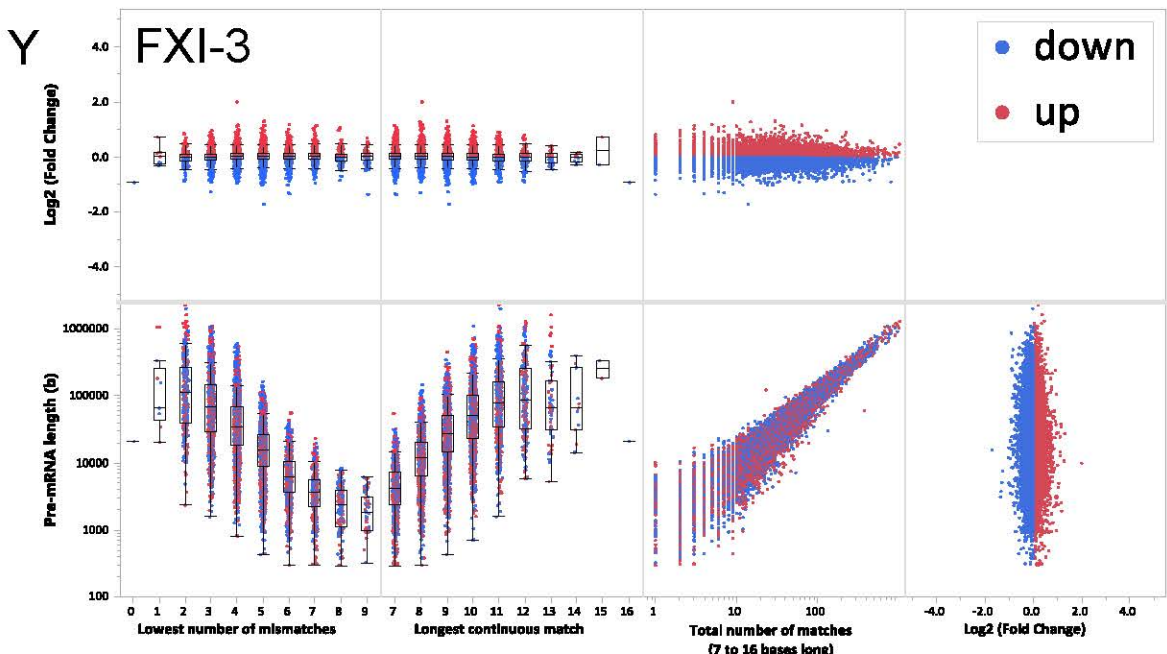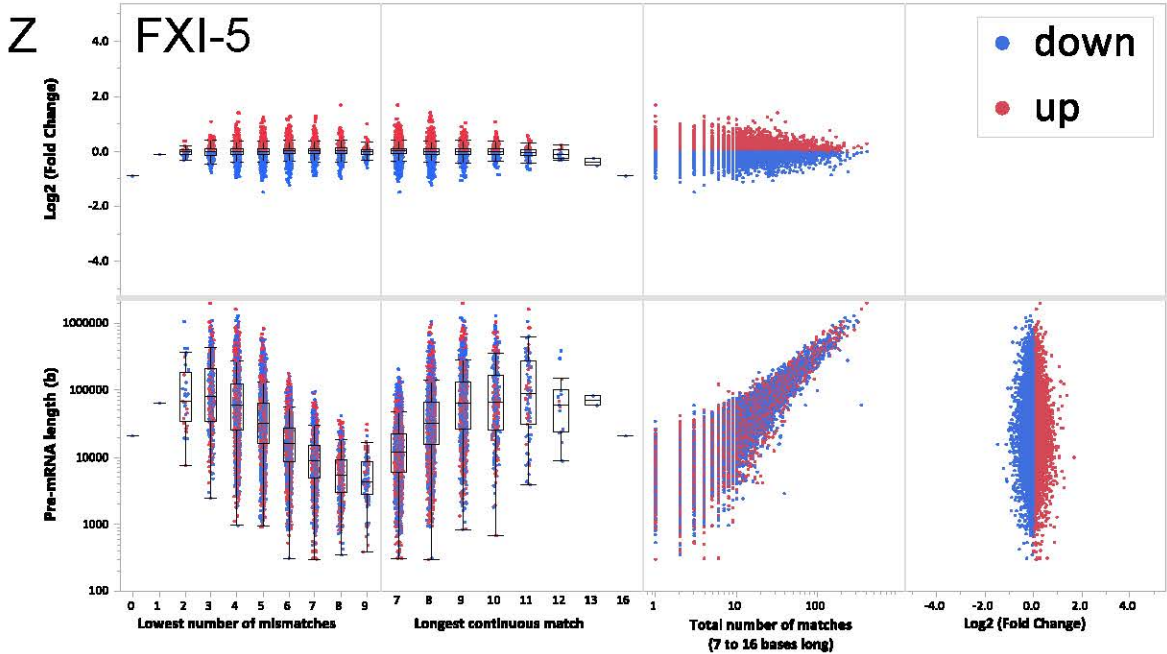

|              | ASO ID | Alt. ID | Dose (mg/kg) | Toxicity (96 h) | ALT (IU/mL) 96 hours |
|--------------|--------|---------|--------------|-----------------|----------------------|
| Top graph    | 571033 | FXI-3   | 33<br>300    | Safe<br>Safe    | 33<br>121            |
| Bottom graph | 571034 | FXI-5   | 33<br>300    | Safe<br>Safe    | 56<br>193            |

# Supplemental Figure 6

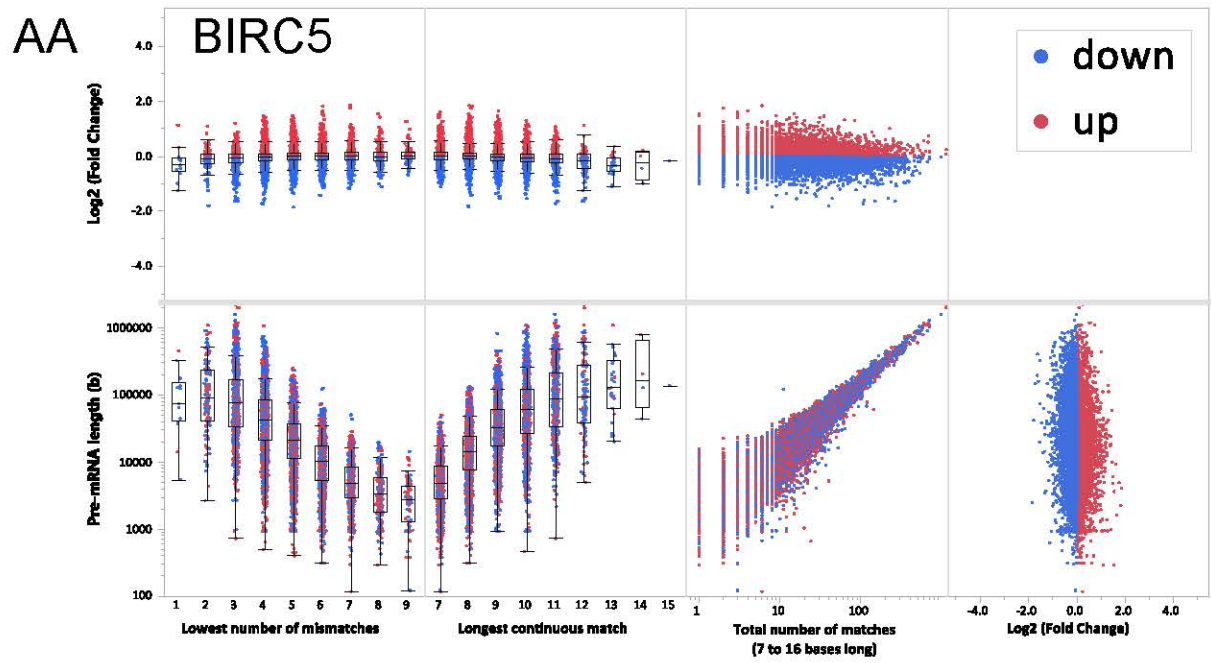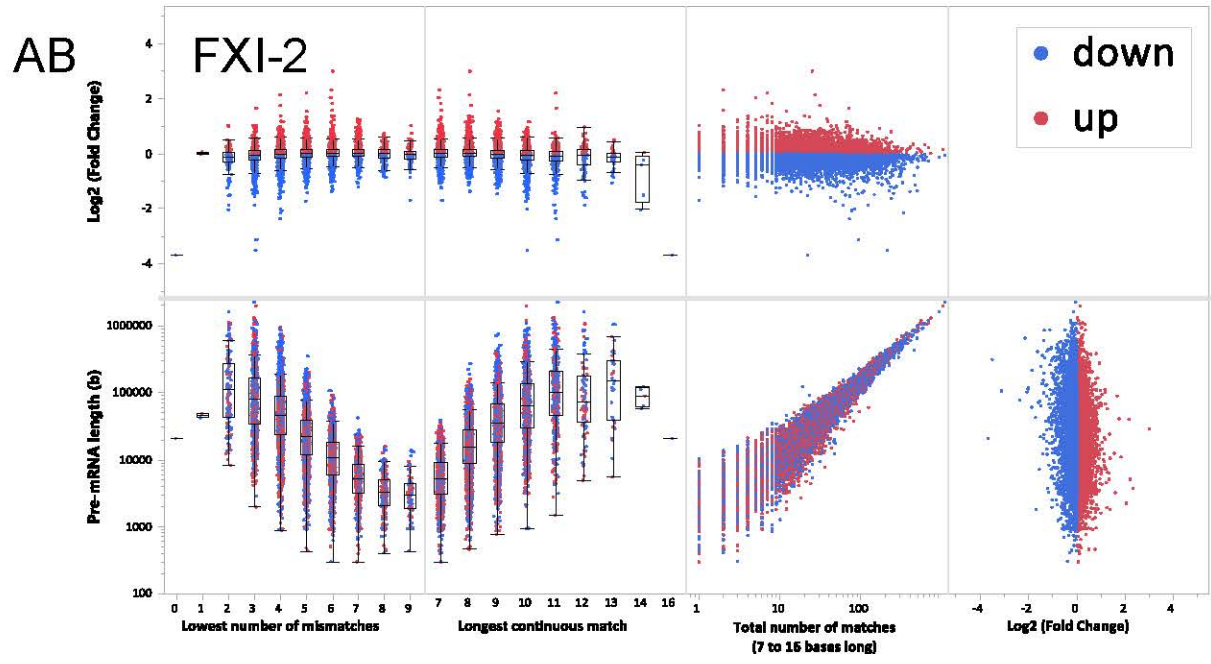

|              | ASO ID | Alt. ID | Dose (mg/kg) | Toxicity (96 h) | ALT (IU/mL) 96 hours |
|--------------|--------|---------|--------------|-----------------|----------------------|
| Top graph    | 554219 | BIRC5   | 33<br>300    | Safe<br>Severe  | 33<br>1475           |
| Bottom graph | 569720 | FXI-2   | 33<br>100    | Safe<br>Severe  | 125<br>10179         |

# Supplemental Figure 6

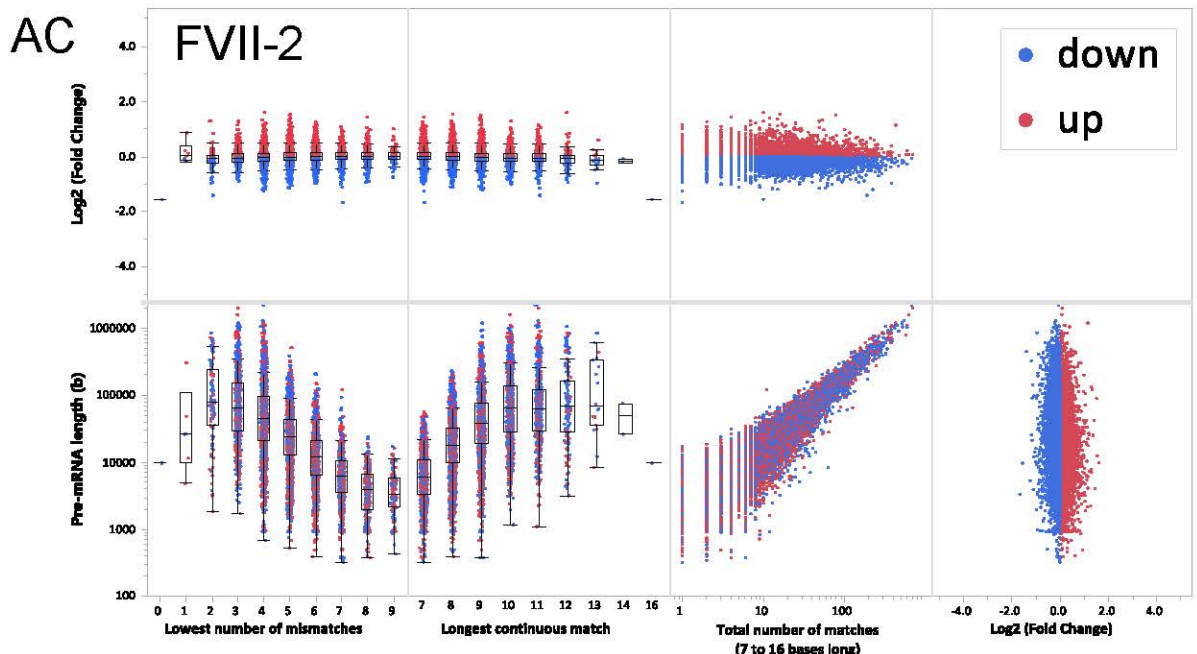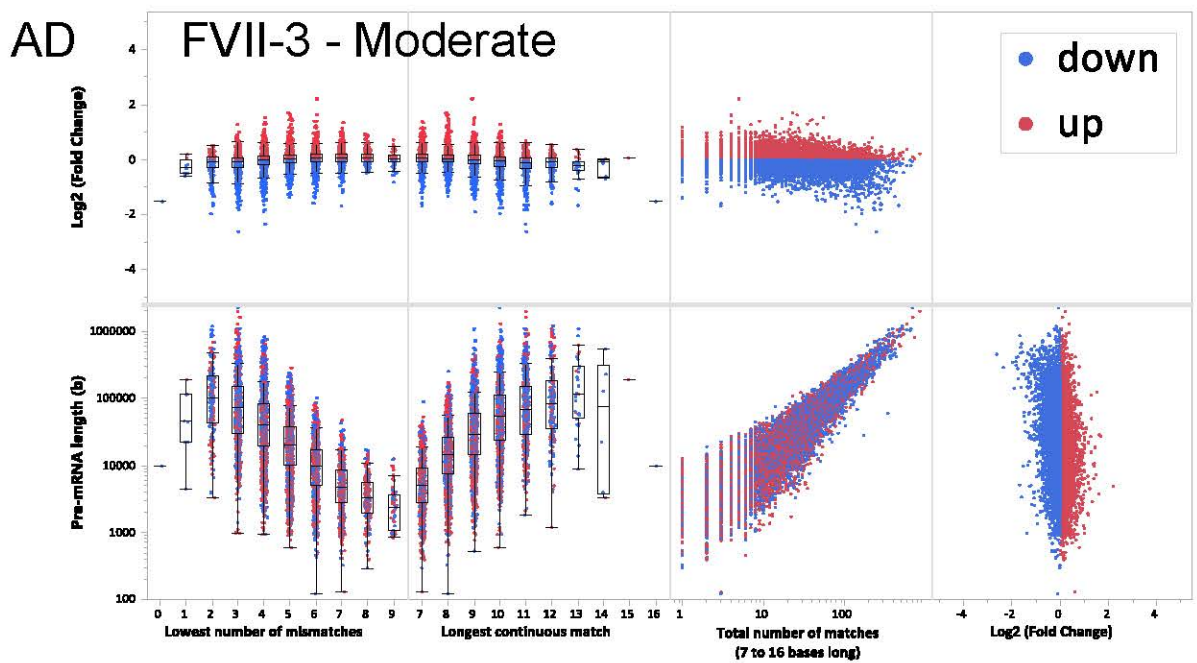

|              | ASO ID | Alt. ID | Dose (mg/kg) | Toxicity (96 h) | ALT (IU/mL) 96 hours |
|--------------|--------|---------|--------------|-----------------|----------------------|
| Top graph    | 569716 | FVII-2  | 33           | Safe            | 128                  |
|              |        |         | 300          | Severe          | 4690                 |
| Bottom graph | 569718 | FVII-3  | 33           | Moderate        | 461                  |
|              |        |         | 100          | Severe          | 5034                 |



# Supplemental Figure 6

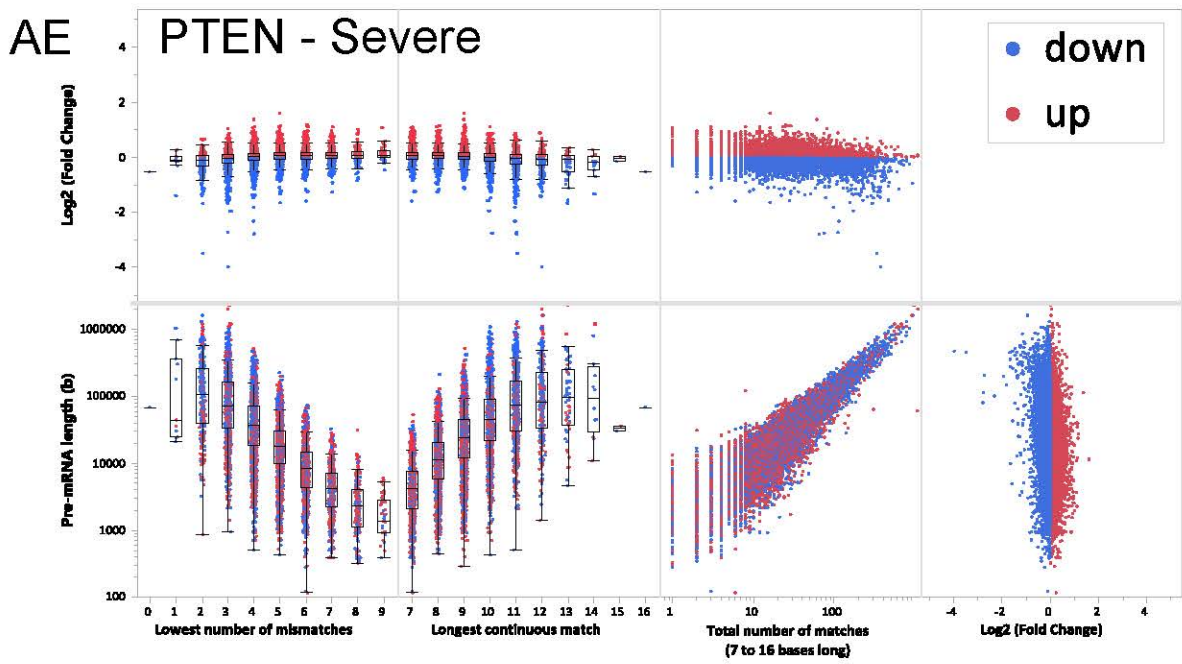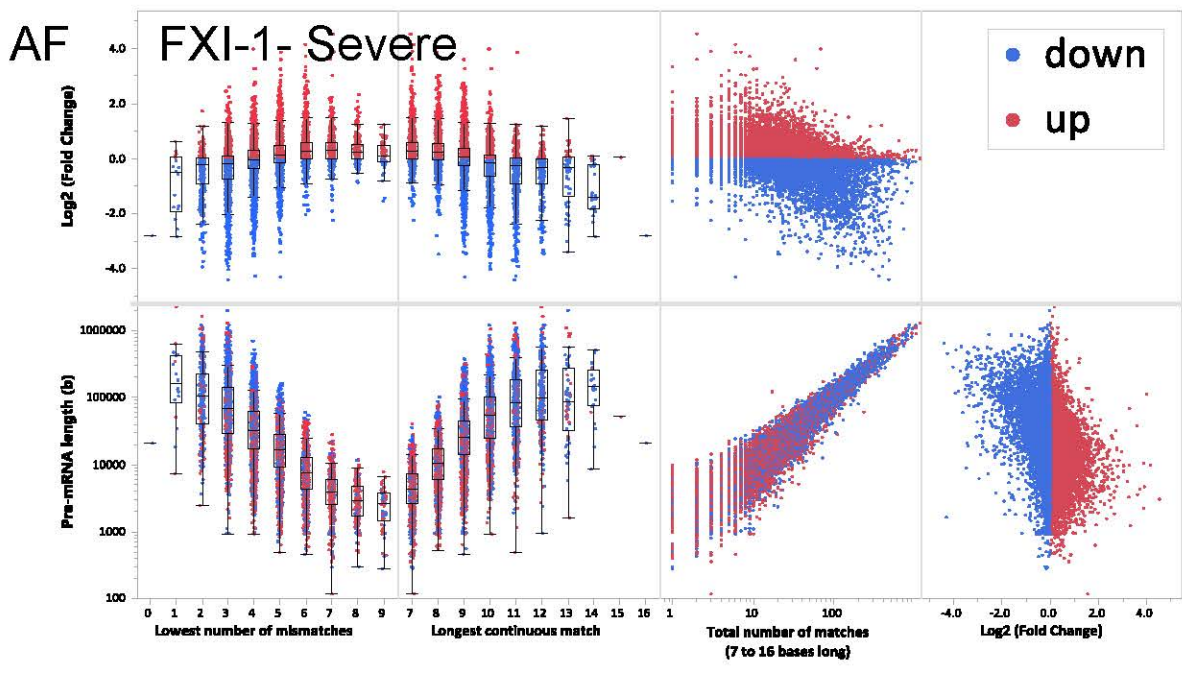

|              | ASO ID | Alt. ID | Dose<br>(mg/kg) | Toxicity<br>(96 h) | ALT (IU/<br>mL)<br>96 hours |
|--------------|--------|---------|-----------------|--------------------|-----------------------------|
| Top graph    | 569717 | PTEN    | 33              | Severe             | 1143                        |
|              |        |         | 100             | Severe             | 10262                       |
| Bottom graph | 569719 | FXI-1   | 11              | Severe             | 1486                        |
|              |        |         | 33              | Severe             | 20000                       |

# Supplemental Figure 6

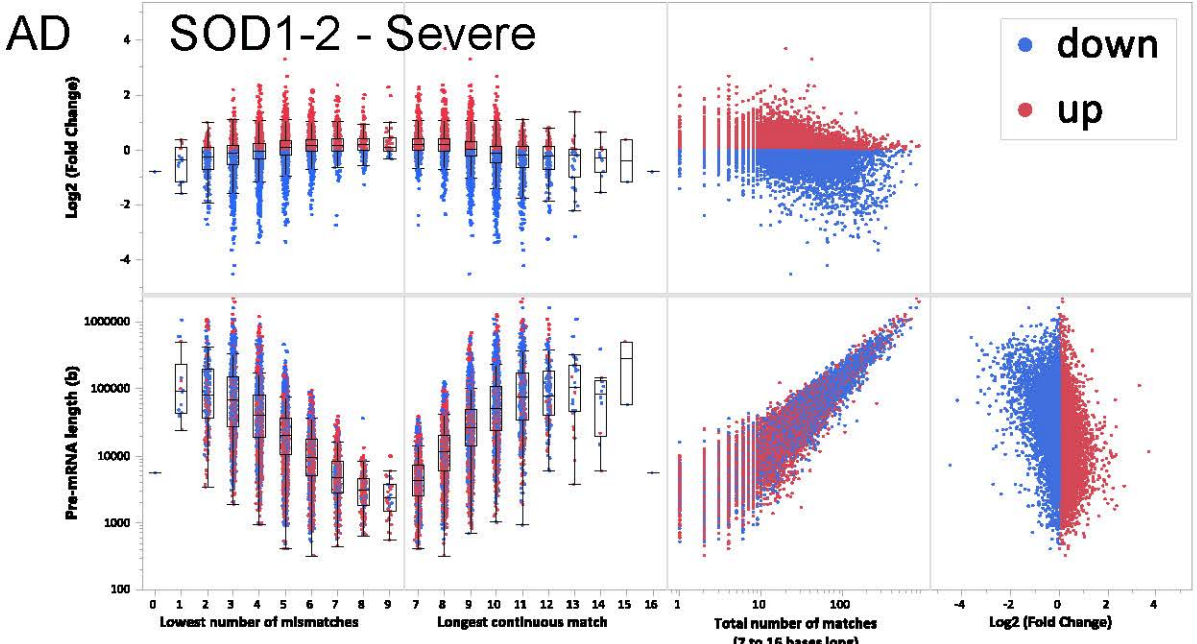

| ASO ID | Alt. ID | Dose (mg/kg) | Toxicity (96 h) | ALT (IU/mL) 96 hours |
|--------|---------|--------------|-----------------|----------------------|
| 569721 | SOD1-2  | 33           | Severe          | 2288                 |

# Supplemental Figure 7

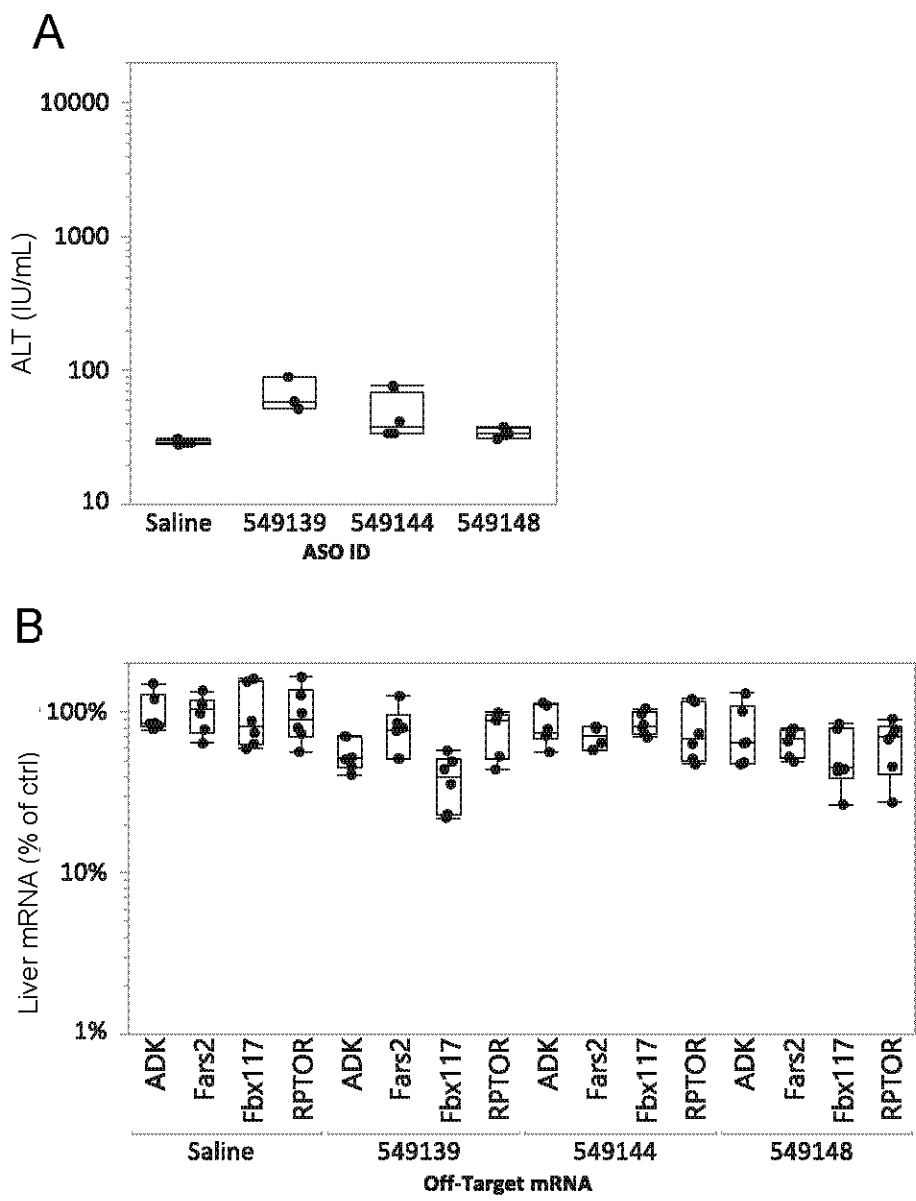

| ISIS No | Sequence                        | modification | Gene         | Genbank number | On-target Species |
|---------|---------------------------------|--------------|--------------|----------------|-------------------|
| 549139  | 5'- <u>GACGCGCCTGAAGGTT</u> -3' | cEt          | N/A, control | N/A            | N/A               |
| 549144  | 5'- <u>GGCCAATACGCCGTC</u> A-3' | cEt          | N/A, control | N/A            | N/A               |
| 549148  | 5'- <u>GGCTACTACGCCGTC</u> A-3' | cEt          | N/A, control | N/A            | N/A               |

# Supplemental Figure 8

A

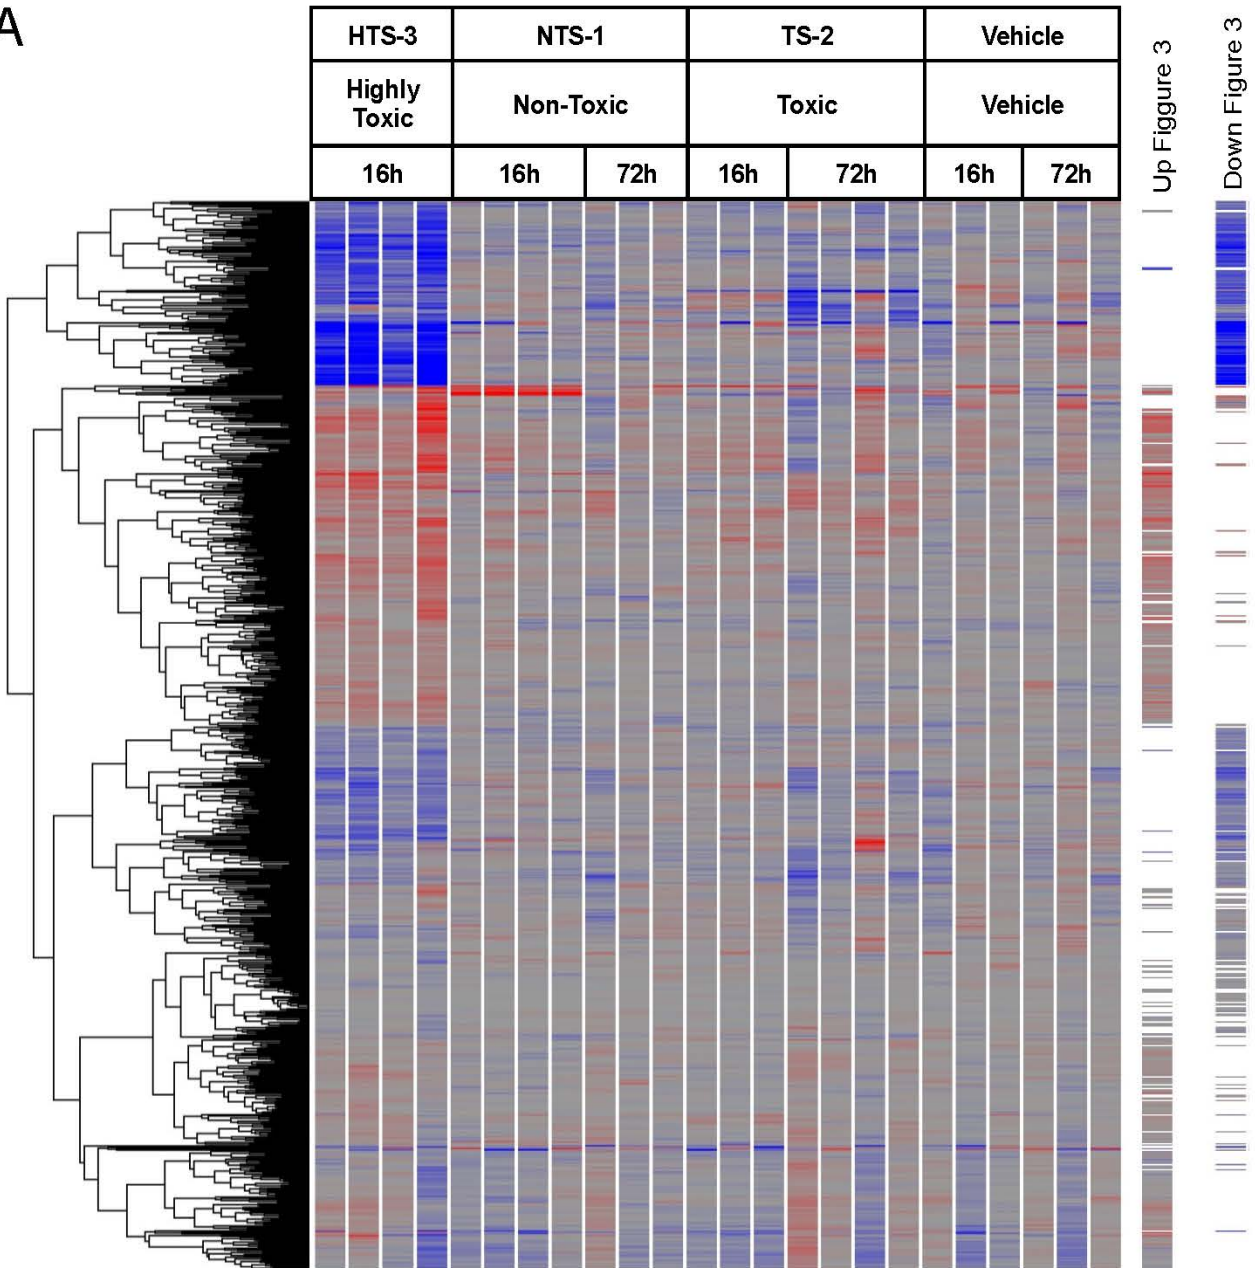

B

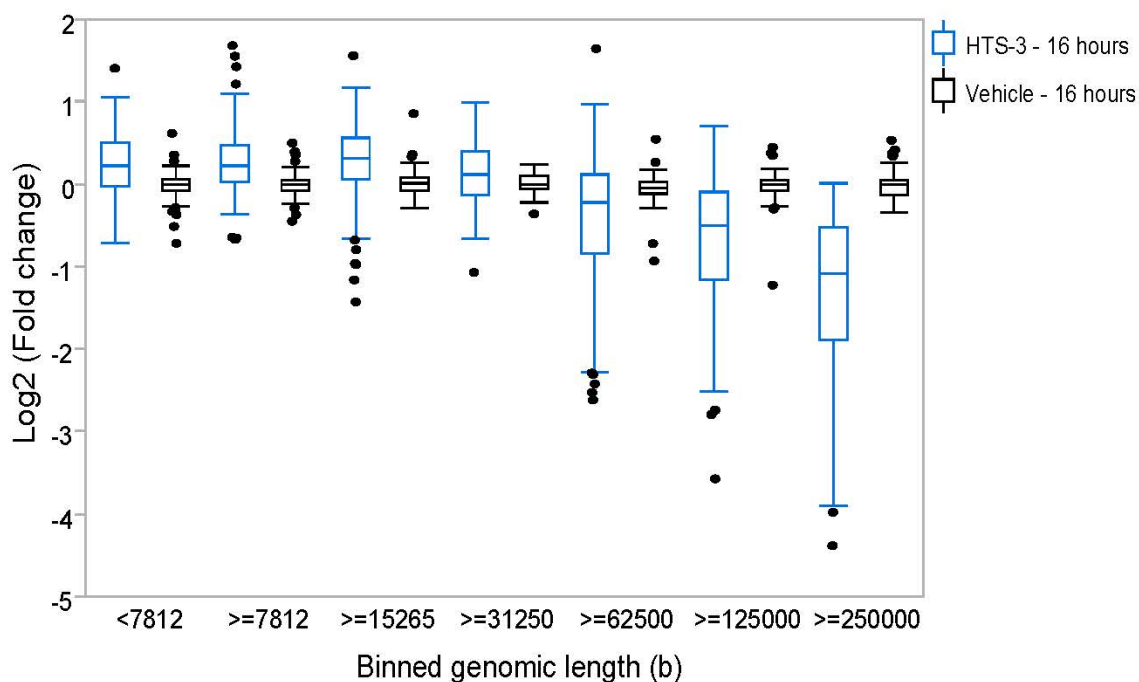

Supplement: supp_gkv1210_nar-02589-f-2015-File008.pdf [file supp_gkv1210_nar-02589-f-2015-File008.pdf]
